# Supplementary material for: Near-Infrared-Responsive Single-Component Hybrid Lead Halides for Photocatalytic C2 Hydrocarbon Production from CO2
Source: Research Square preprint supplement (doi:10.21203/rs.3.rs-6443657/v1), 2025-06-18

## checkCIF/PLATON report

Structure factors have been supplied for datablock(s) p21c

THIS REPORT IS FOR GUIDANCE ONLY. IF USED AS PART OF A REVIEW PROCEDURE FOR PUBLICATION, IT SHOULD NOT REPLACE THE EXPERTISE OF AN EXPERIENCED CRYSTALLOGRAPHIC REFEREE.

No syntax errors found.      CIF dictionary      Interpreting this report

### Datablock: p21c

---

|                 |                                         |                          |              |
|-----------------|-----------------------------------------|--------------------------|--------------|
| Bond precision: | C-C = 0.0144 A                          | Wavelength=0.71073       |              |
| Cell:           | a=12.862 (5)                            | b=17.754 (7)             | c=19.260 (7) |
|                 | alpha=90                                | beta=94.926 (11)         | gamma=90     |
| Temperature:    | 296 K                                   |                          |              |
|                 | Calculated                              | Reported                 |              |
| Volume          | 4382 (3)                                | 4382 (3)                 |              |
| Space group     | P 21/c                                  | P 1 21/c 1               |              |
| Hall group      | -P 2ybc                                 | -P 2ybc                  |              |
| Moiety formula  | C44 H28 Br4 Co N6 O4 Pb2 [+<br>solvent] | C44 H28 Br4 Co N6 O4 Pb2 |              |
| Sum formula     | C44 H28 Br4 Co N6 O4 Pb2 [+<br>solvent] | C44 H28 Br4 Co N6 O4 Pb2 |              |
| Mr              | 1497.66                                 | 1497.67                  |              |
| Dx, g cm-3      | 2.270                                   | 2.270                    |              |
| Z               | 4                                       | 4                        |              |
| Mu (mm-1)       | 11.737                                  | 11.738                   |              |
| F000            | 2788.0                                  | 2788.0                   |              |
| F000'           | 2760.46                                 |                          |              |
| h, k, lmax      | 14, 20, 22                              | 14, 20, 22               |              |
| Nref            | 7239                                    | 7098                     |              |
| Tmin, Tmax      | 0.094, 0.136                            | 0.418, 0.745             |              |
| Tmin'           | 0.060                                   |                          |              |

Correction method= # Reported T Limits: Tmin=0.418 Tmax=0.745  
AbsCorr = MULTI-SCAN

Data completeness= 0.981      Theta (max)= 24.435

R(reflections)= 0.0849( 4601)

wR2(reflections)=  
0.1767( 7098)

S = 1.062

Npar= 454

---

The following ALERTS were generated. Each ALERT has the format

**test-name\_ALERT\_alert-type\_alert-level.**

Click on the hyperlinks for more details of the test.

---

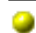

### Alert level C

RINTA01\_ALERT\_3\_C The value of Rint is greater than 0.12

Rint given 0.164

THETM01\_ALERT\_3\_C The value of sine(theta\_max)/wavelength is less than 0.590

Calculated sin(theta\_max)/wavelength = 0.5820

PLAT020\_ALERT\_3\_C The Value of Rint is Greater Than 0.12 ..... 0.164 Report

PLAT241\_ALERT\_2\_C High 'MainMol' Ueq as Compared to Neighbors of Br3 Check

PLAT242\_ALERT\_2\_C Low 'MainMol' Ueq as Compared to Neighbors of Pb2 Check

PLAT342\_ALERT\_3\_C Low Bond Precision on C-C Bonds ..... 0.01441 Ang.

PLAT906\_ALERT\_3\_C Large K Value in the Analysis of Variance ..... 8.778 Check

PLAT906\_ALERT\_3\_C Large K Value in the Analysis of Variance ..... 2.680 Check

PLAT910\_ALERT\_3\_C Missing # of FCF Reflection(s) Below Theta(Min). 7 Note

1 0 0, 1 1 0, 0 2 0, -1 1 1, 0 1 1, 1 1 1,  
0 0 2,

PLAT911\_ALERT\_3\_C Missing FCF Refl Between Thmin & STh/L= 0.582 134 Report

4 0 0, 3 1 0, 1 2 0, 2 2 0, 1 5 0, 2 5 0,

2 7 0, 0 8 0, -5 1 1, -2 1 1, 3 1 1, -1 2 1,

0 2 1, 2 2 1, -5 3 1, -2 3 1, 1 3 1, 5 3 1,

-6 4 1, -1 4 1, 1 4 1, 2 4 1, 3 4 1, 0 5 1,

-1 6 1, 2 6 1, -4 7 1, 4 17 1, 0 20 1, 2 0 2,

4 0 2, -3 1 2, 3 1 2, -1 2 2, 6 2 2, -2 3 2,

3 3 2, -1 4 2, 0 4 2, 4 4 2, 5 4 2, -5 5 2,

-2 5 2, 0 5 2, -4 6 2, -2 6 2, 0 7 2, 3 7 2,

0 8 2, -3 9 2, -6 1 3, -5 1 3, -1 1 3, 0 1 3,

3 1 3, -1 2 3, 0 2 3, 4 2 3, -2 3 3, -1 4 3,

2 4 3, 4 4 3, 0 5 3, -4 6 3, -1 6 3, 4 6 3,

2 7 3, 2 8 3, -5 0 4, -4 0 4, -2 0 4, -1 0 4,

1 0 4, 4 0 4, -5 1 4, -1 1 4, -5 2 4, -4 2 4,

-2 2 4, -1 2 4, 1 2 4, 4 2 4, 0 3 4, -4 4 4,

-2 4 4, -1 4 4, -4 5 4, 0 5 4, 3 5 4, -1 6 4,

0 7 4, 1 7 4, -2 8 4, 3 8 4, 6 16 4, 0 1 5,

PLAT971\_ALERT\_2\_C Check Calcd Resid. Dens. 0.70Ang From Pb1 1.73 eA-3

PLAT971\_ALERT\_2\_C Check Calcd Resid. Dens. 0.44Ang From Pb1 1.54 eA-3

PLAT971\_ALERT\_2\_C Check Calcd Resid. Dens. 1.10Ang From O3 1.54 eA-3

PLAT972\_ALERT\_2\_C Check Calcd Resid. Dens. 0.63Ang From Pb2 -2.06 eA-3

PLAT972\_ALERT\_2\_C Check Calcd Resid. Dens. 0.51Ang From Pb2 -2.02 eA-3

PLAT972\_ALERT\_2\_C Check Calcd Resid. Dens. 0.57Ang From Pb2 -1.93 eA-3

PLAT972\_ALERT\_2\_C Check Calcd Resid. Dens. 0.86Ang From Pb2 -1.73 eA-3

PLAT977\_ALERT\_2\_C Check Negative Difference Density on H34 . -0.33 eA-3

PLAT977\_ALERT\_2\_C Check Negative Difference Density on H39 . -0.43 eA-3

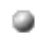

### Alert level G

PLAT003\_ALERT\_2\_G Number of Uiso or U(i,j) Restrained non-H-Atoms 61 Report

PLAT004\_ALERT\_5\_G Polymeric Structure Found with Maximum Dimension 1 Info

PLAT083\_ALERT\_2\_G SHELXL Second Parameter in WGHT Unusually Large 200.00 Why ?

|                   |                                                            |               |
|-------------------|------------------------------------------------------------|---------------|
| PLAT177_ALERT_4_G | The CIF-Embedded .res File Contains DELU Records           | 1 Report      |
| PLAT178_ALERT_4_G | The CIF-Embedded .res File Contains SIMU Records           | 1 Report      |
| PLAT188_ALERT_3_G | A Non-default SIMU Restraint Value has been used           | 0.0100 Report |
| PLAT232_ALERT_2_G | Hirshfeld Test Diff (M-X) Pb1 --Br3 .                      | 6.7 s.u.      |
| PLAT605_ALERT_4_G | Largest Solvent Accessible VOID in the Structure           | 49 A**3       |
| PLAT794_ALERT_5_G | Tentative Bond Valency for Pb1 (II) .                      | 2.42 Info     |
| PLAT794_ALERT_5_G | Tentative Bond Valency for Pb2 (II) .                      | 2.33 Info     |
| PLAT794_ALERT_5_G | Tentative Bond Valency for Col (III) .                     | 3.02 Info     |
| PLAT860_ALERT_3_G | Number of Least-Squares Restraints .....                   | 570 Note      |
| PLAT868_ALERT_4_G | ALERTS Due to the Use of _smtbx_masks Suppressed           | ! Info        |
| PLAT909_ALERT_3_G | Percentage of I>2sig(I) Data at Theta(Max) Still           | 33% Note      |
| PLAT933_ALERT_2_G | Number of HKL-OMIT Records in Embedded .res File           | 128 Note      |
|                   | -6 1 3, -6 4 1, -5 0 4, -5 1 1, -5 1 3, -5 1 4,            |               |
|                   | -5 2 4, -5 3 1, -5 3 5, -5 5 2, -4 0 4, -4 2 4,            |               |
|                   | -4 4 4, -4 5 4, -4 6 2, -4 6 3, -4 7 1, -3 0 6,            |               |
|                   | -3 0 8, -3 1 2, -3 2 6, -3 4 7, -3 6 5, -3 9 2,            |               |
|                   | -2 0 4, -2 1 1, -2 1 7, -2 2 4, -2 2 6, -2 3 1,            |               |
|                   | -2 3 2, -2 3 3, -2 4 4, -2 5 2, -2 6 2, -2 8 4,            |               |
|                   | -1 0 4, -1 1 3, -1 1 4, -1 2 1, -1 2 2, -1 2 3,            |               |
|                   | -1 2 4, -1 4 1, -1 4 2, -1 4 3, -1 4 4, -1 6 1,            |               |
|                   | -1 6 3, -1 6 4,                                            |               |
| PLAT969_ALERT_5_G | The 'Henn et al.' R-Factor-gap value .....                 | 2.804 Note    |
|                   | Predicted wR2: Based on SigI**2 6.30 or SHELX Weight 16.63 |               |
| PLAT978_ALERT_2_G | Number C-C Bonds with Positive Residual Density.           | 0 Info        |

---

0 **ALERT level A** = Most likely a serious problem - resolve or explain  
 0 **ALERT level B** = A potentially serious problem, consider carefully  
 19 **ALERT level C** = Check. Ensure it is not caused by an omission or oversight  
 17 **ALERT level G** = General information/check it is not something unexpected

0 ALERT type 1 CIF construction/syntax error, inconsistent or missing data  
 16 ALERT type 2 Indicator that the structure model may be wrong or deficient  
 11 ALERT type 3 Indicator that the structure quality may be low  
 4 ALERT type 4 Improvement, methodology, query or suggestion  
 5 ALERT type 5 Informative message, check

---

It is advisable to attempt to resolve as many as possible of the alerts in all categories. Often the minor alerts point to easily fixed oversights, errors and omissions in your CIF or refinement strategy, so attention to these fine details can be worthwhile. In order to resolve some of the more serious problems it may be necessary to carry out additional measurements or structure refinements. However, the purpose of your study may justify the reported deviations and the more serious of these should normally be commented upon in the discussion or experimental section of a paper or in the "special\_details" fields of the CIF. checkCIF was carefully designed to identify outliers and unusual parameters, but every test has its limitations and alerts that are not important in a particular case may appear. Conversely, the absence of alerts does not guarantee there are no aspects of the results needing attention. It is up to the individual to critically assess their own results and, if necessary, seek expert advice.

### **Publication of your CIF in IUCr journals**

A basic structural check has been run on your CIF. These basic checks will be run on all CIFs submitted for publication in IUCr journals (*Acta Crystallographica*, *Journal of Applied Crystallography*, *Journal of Synchrotron Radiation*); however, if you intend to submit to *Acta Crystallographica Section C* or *E* or *IUCrData*, you should make sure that full publication checks are run on the final version of your CIF prior to submission.

### **Publication of your CIF in other journals**

Please refer to the *Notes for Authors* of the relevant journal for any special instructions relating to CIF submission.

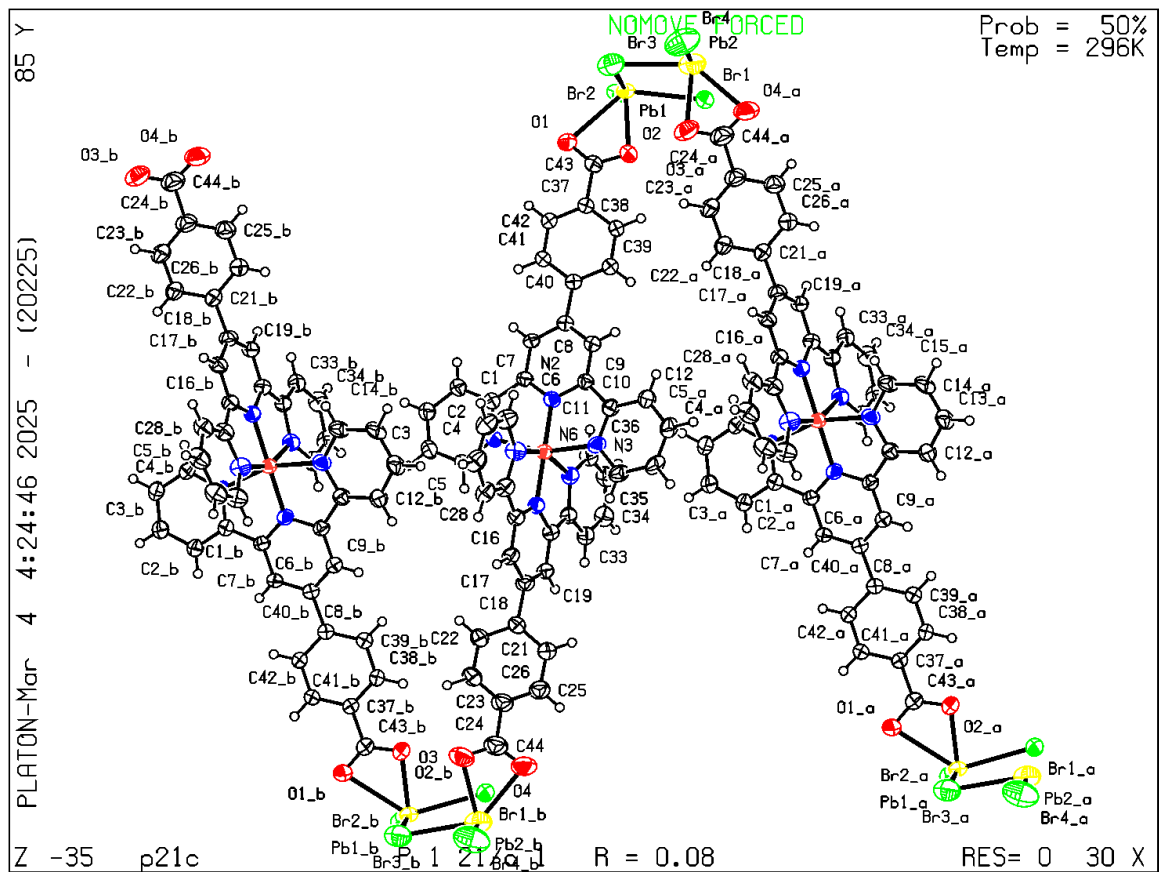

## checkCIF/PLATON report

Structure factors have been supplied for datablock(s) mo\_fe\_br\_a

THIS REPORT IS FOR GUIDANCE ONLY. IF USED AS PART OF A REVIEW PROCEDURE FOR PUBLICATION, IT SHOULD NOT REPLACE THE EXPERTISE OF AN EXPERIENCED CRYSTALLOGRAPHIC REFEREE.

No syntax errors found.      CIF dictionary      Interpreting this report

### Datablock: mo\_fe\_br\_a

---

|                 |                                         |                               |                         |
|-----------------|-----------------------------------------|-------------------------------|-------------------------|
| Bond precision: | C-C = 0.0155 A                          | Wavelength=0.71073            |                         |
| Cell:           | a=12.8594(19)<br>alpha=90               | b=17.715(2)<br>beta=96.048(4) | c=19.123(3)<br>gamma=90 |
| Temperature:    | 273 K                                   |                               |                         |
|                 | Calculated                              | Reported                      |                         |
| Volume          | 4332.1(11)                              | 4332.0(10)                    |                         |
| Space group     | P 21/c                                  | P 1 21/c 1                    |                         |
| Hall group      | -P 2ybc                                 | -P 2ybc                       |                         |
| Moiety formula  | C44 H28 Br4 Fe N6 O4 Pb2 [+<br>solvent] | C44 H28 Br4 Fe N6 O4 Pb2      |                         |
| Sum formula     | C44 H28 Br4 Fe N6 O4 Pb2 [+<br>solvent] | C44 H28 Br4 Fe N6 O4 Pb2      |                         |
| Mr              | 1494.58                                 | 1494.59                       |                         |
| Dx, g cm-3      | 2.292                                   | 2.292                         |                         |
| Z               | 4                                       | 4                             |                         |
| Mu (mm-1)       | 11.824                                  | 11.825                        |                         |
| F000            | 2784.0                                  | 2784.0                        |                         |
| F000'           | 2756.44                                 |                               |                         |
| h, k, lmax      | 15, 21, 22                              | 15, 21, 22                    |                         |
| Nref            | 7669                                    | 7596                          |                         |
| Tmin, Tmax      | 0.137, 0.170                            | 0.420, 0.745                  |                         |
| Tmin'           | 0.103                                   |                               |                         |

Correction method= # Reported T Limits: Tmin=0.420 Tmax=0.745  
AbsCorr = MULTI-SCAN

Data completeness= 0.990      Theta(max)= 25.048

R(reflections)= 0.0948( 5425)

wR2(reflections)=  
0.2003( 7596)

S = 1.017

Npar= 458

The following ALERTS were generated. Each ALERT has the format

**test-name\_ALERT\_alert-type\_alert-level.**

Click on the hyperlinks for more details of the test.



### Alert level C

|                   |         |                                           |           |           |
|-------------------|---------|-------------------------------------------|-----------|-----------|
| PLAT241_ALERT_2_C | High    | 'MainMol' Ueq as Compared to Neighbors of | Br1       | Check     |
| PLAT241_ALERT_2_C | High    | 'MainMol' Ueq as Compared to Neighbors of | Br2       | Check     |
| PLAT342_ALERT_3_C | Low     | Bond Precision on C-C Bonds .....         | 0.0155    | Ang.      |
| PLAT369_ALERT_2_C | Long    | C(sp2)-C(sp2) Bond C18 - C21 .            | 1.53      | Ang.      |
| PLAT369_ALERT_2_C | Long    | C(sp2)-C(sp2) Bond C35 - C44 .            | 1.53      | Ang.      |
| PLAT906_ALERT_3_C | Large   | K Value in the Analysis of Variance ..... | 12.734    | Check     |
| PLAT906_ALERT_3_C | Large   | K Value in the Analysis of Variance ..... | 3.108     | Check     |
| PLAT910_ALERT_3_C | Missing | # of FCF Reflection(s) Below Theta(Min).  | 7         | Note      |
|                   | 1 0 0,  | 1 1 0, 0 2 0, -1 1 1, 0 1 1,              | 1 1 1,    |           |
|                   | 0 0 2,  |                                           |           |           |
| PLAT911_ALERT_3_C | Missing | FCF Refl Between Thmin & STh/L=           | 0.596     | 67 Report |
|                   | 4 0 0,  | 0 4 0, -5 1 1, 3 1 1, 0 2 1,              | 2 2 1,    |           |
|                   | -1 4 1, | 2 4 1, -2 9 1, 1 0 2, 2 0 2,              | 4 0 2,    |           |
|                   | 1 1 2,  | 3 1 2, 0 2 2, -2 3 2, 3 3 2,              | 0 4 2,    |           |
|                   | 4 4 2,  | 0 5 2, 3 5 2, 3 7 2, 0 8 2,               | 2 8 2,    |           |
|                   | 5 8 2,  | -3 9 2, -5 1 3, -1 2 3, 4 2 3,            | -2 3 3,   |           |
|                   | -1 4 3, | 2 4 3, -1 6 3, -4 0 4, -2 0 4,            | -5 1 4,   |           |
|                   | 0 1 4,  | -4 2 4, 4 2 4, 0 3 4, -15 4 4,            | -4 4 4,   |           |
|                   | -1 4 4, | 0 5 4, 3 5 4, 0 7 4, -13 11 4,            | 0 1 5,    |           |
|                   | 0 3 5,  | 1 6 5, -1 7 5, 9 16 5, 0 0 6,             | -4 1 6,   |           |
|                   | 5 1 6,  | -3 2 6, -5 6 6, -2 1 7, 1 1 7,            | 5 1 7,    |           |
|                   | -1 7 7, | 0 20 7, -1 1 12, 5 16 12, -13 0 14,       | -2 14 17, |           |
|                   | 4 3 21, |                                           |           |           |
| PLAT971_ALERT_2_C | Check   | Calcd Resid. Dens. 0.62Ang From Pb3       | 1.96      | eA-3      |
| PLAT971_ALERT_2_C | Check   | Calcd Resid. Dens. 1.01Ang From Br3       | 1.95      | eA-3      |
| PLAT971_ALERT_2_C | Check   | Calcd Resid. Dens. 0.42Ang From Pb1       | 1.65      | eA-3      |
| PLAT972_ALERT_2_C | Check   | Calcd Resid. Dens. 0.53Ang From Pb2       | -2.34     | eA-3      |
| PLAT972_ALERT_2_C | Check   | Calcd Resid. Dens. 0.70Ang From Pb2       | -2.30     | eA-3      |
| PLAT972_ALERT_2_C | Check   | Calcd Resid. Dens. 0.55Ang From Pb2       | -2.20     | eA-3      |
| PLAT972_ALERT_2_C | Check   | Calcd Resid. Dens. 1.00Ang From Pb3       | -1.55     | eA-3      |
| PLAT977_ALERT_2_C | Check   | Negative Difference Density on H7 .       | -0.38     | eA-3      |
| PLAT977_ALERT_2_C | Check   | Negative Difference Density on H14 .      | -0.34     | eA-3      |

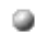

### Alert level G

|                   |                                                  |                        |        |        |
|-------------------|--------------------------------------------------|------------------------|--------|--------|
| PLAT003_ALERT_2_G | Number of Uiso or U(i,j)                         | Restrained non-H-Atoms | 62     | Report |
| PLAT004_ALERT_5_G | Polymeric Structure Found with Maximum Dimension |                        | 1      | Info   |
| PLAT083_ALERT_2_G | SHELXL Second Parameter in WGHT                  | Unusually Large        | 300.00 | Why ?  |
| PLAT171_ALERT_4_G | The CIF-Embedded .res File Contains EADP Records |                        | 1      | Report |
| PLAT177_ALERT_4_G | The CIF-Embedded .res File Contains DELU Records |                        | 1      | Report |
| PLAT178_ALERT_4_G | The CIF-Embedded .res File Contains SIMU Records |                        | 1      | Report |
| PLAT188_ALERT_3_G | A Non-default SIMU Restraint Value has been used |                        | 0.0100 | Report |
| PLAT199_ALERT_1_G | Reported _cell_measurement_temperature .....     | (K)                    | 273    | Check  |
| PLAT200_ALERT_1_G | Reported _diffn_ambient_temperature .....        | (K)                    | 273    | Check  |
| PLAT232_ALERT_2_G | Hirshfeld Test Diff (M-X)                        | Pb1 --Br2 .            | 14.5   | s.u.   |

PLAT232\_ALERT\_2\_G Hirshfeld Test Diff (M-X) Pb1 --Br3\_a . 17.0 s.u.  
 PLAT232\_ALERT\_2\_G Hirshfeld Test Diff (M-X) Pb3 --Br2 . 14.5 s.u.  
 PLAT232\_ALERT\_2\_G Hirshfeld Test Diff (M-X) Pb3 --Br3\_a . 16.0 s.u.  
 PLAT301\_ALERT\_3\_G Main Residue Disorder .....(Resd 1) 2% Note  
 PLAT605\_ALERT\_4\_G Largest Solvent Accessible VOID in the Structure 41 A\*\*3  
 PLAT794\_ALERT\_5\_G Tentative Bond Valency for Pb2 (II) . 2.36 Info  
 PLAT860\_ALERT\_3\_G Number of Least-Squares Restraints ..... 609 Note  
 PLAT868\_ALERT\_4\_G ALERTS Due to the Use of \_smtbx\_masks Suppressed ! Info  
 PLAT883\_ALERT\_1\_G Absent Datum for \_atom\_sites\_solution\_primary .. Please Do !  
 PLAT909\_ALERT\_3\_G Percentage of I>2sig(I) Data at Theta(Max) Still 40% Note  
 PLAT933\_ALERT\_2\_G Number of HKL-OMIT Records in Embedded .res File 58 Note  
     -5 1 1, -5 1 3, -5 1 4, -5 6 6, -4 0 4, -4 1 6,  
     -4 2 4, -4 4 4, -3 2 6, -3 9 2, -2 0 4, -2 1 7,  
     -2 3 2, -2 3 3, -2 9 1, -1 1 12, -1 2 3, -1 4 1,  
     -1 4 3, -1 4 4, -1 6 3, -1 7 5, -1 7 7, 0 0 6,  
     0 1 4, 0 1 5, 0 2 1, 0 2 2, 0 3 4, 0 3 5,  
     0 4 0, 0 4 2, 0 5 2, 0 5 4, 0 7 4, 0 8 2,  
     1 1 2, 1 1 7, 1 6 5, 2 0 2, 2 2 1, 2 4 1,  
     2 4 3, 2 8 2, 3 1 1, 3 1 2, 3 3 2, 3 5 2,  
     3 5 4, 3 7 2,  
 PLAT969\_ALERT\_5\_G The 'Henn et al.' R-Factor-gap value ..... 3.092 Note  
     Predicted wR2: Based on SigI\*\*2 6.48 or SHELX Weight 19.68  
 PLAT978\_ALERT\_2\_G Number C-C Bonds with Positive Residual Density. 0 Info

---

0 **ALERT level A** = Most likely a serious problem - resolve or explain  
 0 **ALERT level B** = A potentially serious problem, consider carefully  
 18 **ALERT level C** = Check. Ensure it is not caused by an omission or oversight  
 23 **ALERT level G** = General information/check it is not something unexpected

3 ALERT type 1 CIF construction/syntax error, inconsistent or missing data  
 21 ALERT type 2 Indicator that the structure model may be wrong or deficient  
 9 ALERT type 3 Indicator that the structure quality may be low  
 5 ALERT type 4 Improvement, methodology, query or suggestion  
 3 ALERT type 5 Informative message, check

---



It is advisable to attempt to resolve as many as possible of the alerts in all categories. Often the minor alerts point to easily fixed oversights, errors and omissions in your CIF or refinement strategy, so attention to these fine details can be worthwhile. In order to resolve some of the more serious problems it may be necessary to carry out additional measurements or structure refinements. However, the purpose of your study may justify the reported deviations and the more serious of these should normally be commented upon in the discussion or experimental section of a paper or in the "special\_details" fields of the CIF. checkCIF was carefully designed to identify outliers and unusual parameters, but every test has its limitations and alerts that are not important in a particular case may appear. Conversely, the absence of alerts does not guarantee there are no aspects of the results needing attention. It is up to the individual to critically assess their own results and, if necessary, seek expert advice.

### **Publication of your CIF in IUCr journals**

A basic structural check has been run on your CIF. These basic checks will be run on all CIFs submitted for publication in IUCr journals (*Acta Crystallographica*, *Journal of Applied Crystallography*, *Journal of Synchrotron Radiation*); however, if you intend to submit to *Acta Crystallographica Section C* or *E* or *IUCrData*, you should make sure that full publication checks are run on the final version of your CIF prior to submission.

### **Publication of your CIF in other journals**

Please refer to the *Notes for Authors* of the relevant journal for any special instructions relating to CIF submission.

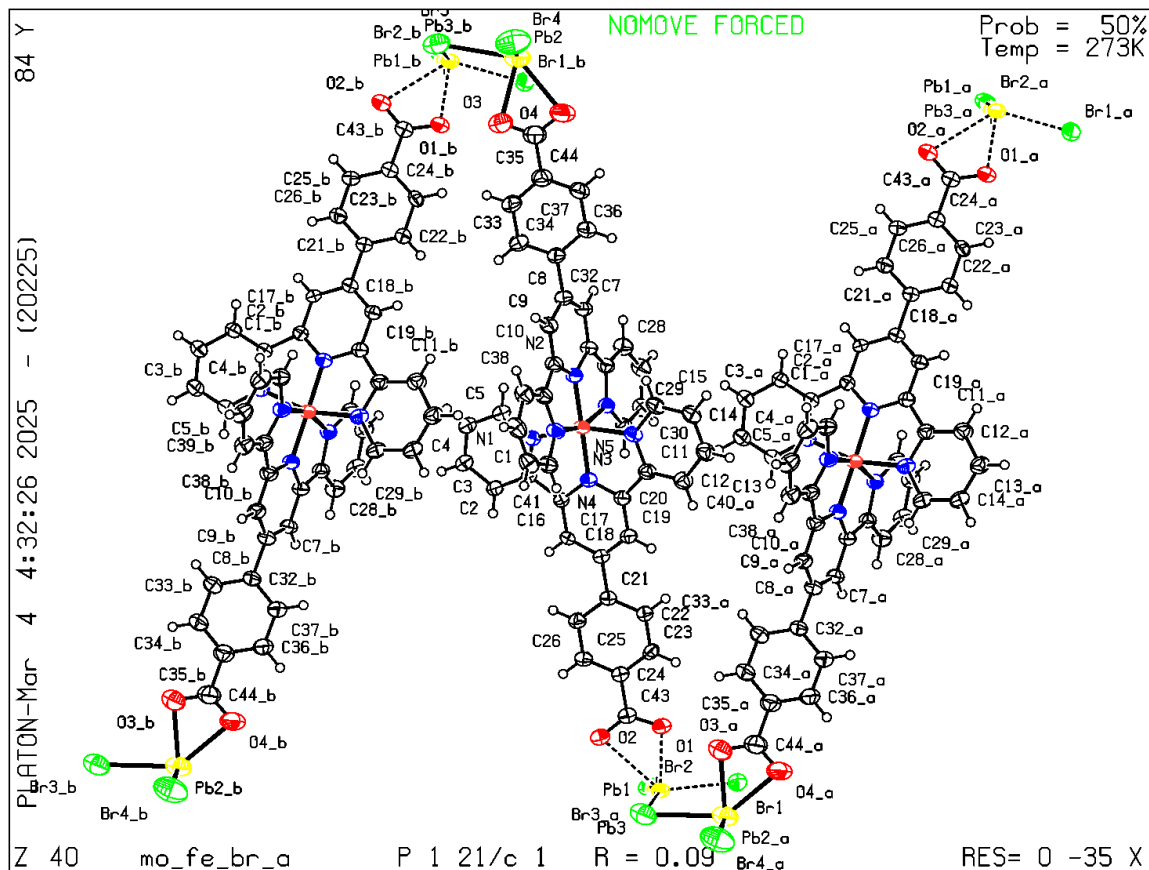

## checkCIF/PLATON report

Structure factors have been supplied for datablock(s) 1

THIS REPORT IS FOR GUIDANCE ONLY. IF USED AS PART OF A REVIEW PROCEDURE FOR PUBLICATION, IT SHOULD NOT REPLACE THE EXPERTISE OF AN EXPERIENCED CRYSTALLOGRAPHIC REFEREE.

No syntax errors found.      CIF dictionary      Interpreting this report

### Datablock: 1

---

|                        |                          |                                 |                           |
|------------------------|--------------------------|---------------------------------|---------------------------|
| Bond precision:        | C-C = 0.0277 Å           | Wavelength=0.71073              |                           |
| Cell:                  | a=12.882 (8)<br>alpha=90 | b=17.747 (12)<br>beta=84.80 (3) | c=19.366 (11)<br>gamma=90 |
| Temperature:           | 296 K                    |                                 |                           |
|                        | Calculated               | Reported                        |                           |
| Volume                 | 4409 (5)                 | 4409 (5)                        |                           |
| Space group            | P 21/c                   | P 1 21/c 1                      |                           |
| Hall group             | -P 2ybc                  | -P 2ybc                         |                           |
| Moiety formula         | C44 H28 Br4 N6 Ni O4 Pb2 | C44 H28 Br4 N6 Ni O4 Pb2        |                           |
| Sum formula            | C44 H28 Br4 N6 Ni O4 Pb2 | C44 H28 Br4 N6 Ni O4 Pb2        |                           |
| Mr                     | 1497.42                  | 1497.45                         |                           |
| Dx, g cm <sup>-3</sup> | 2.256                    | 2.256                           |                           |
| Z                      | 4                        | 4                               |                           |
| Mu (mm <sup>-1</sup> ) | 11.716                   | 11.715                          |                           |
| F000                   | 2792.0                   | 2792.0                          |                           |
| F000'                  | 2764.44                  |                                 |                           |
| h, k, lmax             | 14, 19, 21               | 14, 19, 21                      |                           |
| Nref                   | 6178                     | 6112                            |                           |
| Tmin, Tmax             | 0.121, 0.173             | 0.430, 0.745                    |                           |
| Tmin'                  | 0.084                    |                                 |                           |

Correction method= # Reported T Limits: Tmin=0.430 Tmax=0.745  
AbsCorr = MULTI-SCAN

Data completeness= 0.989      Theta (max)= 23.059

|                                |                                  |
|--------------------------------|----------------------------------|
| R(reflections)= 0.1078 ( 2440) | wR2(reflections)= 0.2403 ( 6112) |
| S = 1.090                      | Npar= 454                        |

---

The following ALERTS were generated. Each ALERT has the format

**test-name\_ALERT\_alert-type\_alert-level.**

Click on the hyperlinks for more details of the test.

---

### Alert level A

RINTA01\_ALERT\_3\_A The value of Rint is greater than 0.25  
Rint given 0.311

**Author Response: This is due to the poor diffraction of the crystal.**

PLAT020\_ALERT\_3\_A The Value of Rint is Greater Than 0.12 ..... 0.311 Report

**Author Response: This is due to the poor diffraction of the crystal.**

---

### Alert level B

THETM01\_ALERT\_3\_B The value of sine(theta\_max)/wavelength is less than 0.575  
Calculated sin(theta\_max)/wavelength = 0.5511

**Author Response: crystal diffracted weakly, the diffraction limit can only reach 0.91.**

PLAT342\_ALERT\_3\_B Low Bond Precision on C-C Bonds ..... 0.02773 Ang.

**Author Response: Poor data quality in context with large assymmetric unit.**

---

### Alert level C

PLAT026\_ALERT\_3\_C Ratio Observed / Unique Reflections (too) Low .. 40% Check  
PLAT082\_ALERT\_2\_C High R1 Value ..... 0.11 Report  
PLAT157\_ALERT\_4\_C Non-standard Monoclinic Beta Angle less 90 Deg 84.80 Degree  
PLAT601\_ALERT\_2\_C Unit Cell Contains Solvent Accessible VOIDS <= 60 Ang\*\*3  
PLAT906\_ALERT\_3\_C Large K Value in the Analysis of Variance ..... 15.443 Check  
PLAT906\_ALERT\_3\_C Large K Value in the Analysis of Variance ..... 2.989 Check  
PLAT910\_ALERT\_3\_C Missing # of FCF Reflection(s) Below Theta(Min). 10 Note  
1 0 0, 1 1 0, 0 2 0, -1 1 1, 0 1 1, 1 1 1,  
0 2 1, 0 0 2, 1 0 2, 0 1 2,  
PLAT911\_ALERT\_3\_C Missing FCF Refl Between Thmin & STh/L= 0.551 56 Report  
14 2 0, -14 1 1, -3 1 1, 2 1 1, 14 3 1, -8 16 1,  
7 17 1, -4 0 2, 4 0 2, -3 1 2, 1 2 2, 14 3 2,  
0 4 2, 1 4 2, -13 7 2, 0 1 3, 14 3 3, 0 5 3,  
9 15 3, 2 0 4, -4 2 4, -1 2 4, 14 2 4, -12 9 4,  
0 1 5, 14 1 5, -9 14 5, -13 3 6, 0 1 7, 13 6 7,  
13 4 9, -10 10 9, 13 1 10, 13 2 10, 12 7 10, -9 11 10,  
8 7 11, -6 14 11, 12 4 12, -10 4 13, -7 10 14, 7 12 14,  
10 3 16, 8 3 17, -7 4 17, 9 4 17, -5 0 18, 7 3 18,  
6 8 18, 5 9 18, -1 1 19, 1 2 19, 1 0 20, -1 1 21,  
1 2 21, 0 3 21,

|                   |                                          |                  |            |
|-------------------|------------------------------------------|------------------|------------|
| PLAT971_ALERT_2_C | Check Calcd Resid. Dens.                 | 0.31Ang From Pb1 | 1.99 eA-3  |
| PLAT972_ALERT_2_C | Check Calcd Resid. Dens.                 | 0.95Ang From Pb2 | -2.07 eA-3 |
| PLAT972_ALERT_2_C | Check Calcd Resid. Dens.                 | 0.72Ang From Pb2 | -2.02 eA-3 |
| PLAT972_ALERT_2_C | Check Calcd Resid. Dens.                 | 0.74Ang From Pb2 | -1.93 eA-3 |
| PLAT972_ALERT_2_C | Check Calcd Resid. Dens.                 | 0.68Ang From Pb2 | -1.85 eA-3 |
| PLAT977_ALERT_2_C | Check Negative Difference Density on H3  | .                | -0.40 eA-3 |
| PLAT977_ALERT_2_C | Check Negative Difference Density on H4  | .                | -0.37 eA-3 |
| PLAT977_ALERT_2_C | Check Negative Difference Density on H7  | .                | -0.36 eA-3 |
| PLAT977_ALERT_2_C | Check Negative Difference Density on H12 | .                | -0.45 eA-3 |
| PLAT977_ALERT_2_C | Check Negative Difference Density on H26 | .                | -0.43 eA-3 |
| PLAT977_ALERT_2_C | Check Negative Difference Density on H40 | .                | -0.43 eA-3 |

### Alert level G

|                   |                                                             |        |              |
|-------------------|-------------------------------------------------------------|--------|--------------|
| PLAT002_ALERT_2_G | Number of Distance or Angle Restraints on AtSite            | 2      | Note         |
| PLAT003_ALERT_2_G | Number of Uiso or U(i,j) Restrained non-H-Atoms             | 61     | Report       |
| PLAT004_ALERT_5_G | Polymeric Structure Found with Maximum Dimension            | 1      | Info         |
| PLAT083_ALERT_2_G | SHELXL Second Parameter in WGHT Unusually Large             | 230.00 | Why ?        |
| PLAT158_ALERT_4_G | The Input Unit Cell is NOT Standard/Reduced .....           |        | Please Check |
| PLAT172_ALERT_4_G | The CIF-Embedded .res File Contains DFIX Records            | 1      | Report       |
| PLAT177_ALERT_4_G | The CIF-Embedded .res File Contains DELU Records            | 1      | Report       |
| PLAT178_ALERT_4_G | The CIF-Embedded .res File Contains SIMU Records            | 1      | Report       |
| PLAT188_ALERT_3_G | A Non-default SIMU Restraint Value has been used            | 0.0100 | Report       |
| PLAT720_ALERT_4_G | Number of Unusual/Non-Standard Labels .....                 | 1      | Note         |
|                   | NiO3                                                        |        |              |
| PLAT794_ALERT_5_G | Tentative Bond Valency for Pb1 (II)                         | 2.46   | Info         |
| PLAT794_ALERT_5_G | Tentative Bond Valency for Pb2 (II)                         | 2.30   | Info         |
| PLAT794_ALERT_5_G | Tentative Bond Valency for NiO3 (II)                        | 2.24   | Info         |
| PLAT860_ALERT_3_G | Number of Least-Squares Restraints .....                    | 571    | Note         |
| PLAT933_ALERT_2_G | Number of HKL-OMIT Records in Embedded .res File            | 13     | Note         |
|                   | -4 0 2, -4 2 4, -3 1 1, -3 1 2, -1 2 4, 0 1 3,              |        |              |
|                   | 0 1 5, 0 1 7, 0 4 2, 0 5 3, 1 2 2, 1 4 2,                   |        |              |
|                   | 2 1 1,                                                      |        |              |
| PLAT941_ALERT_3_G | Average HKL Measurement Multiplicity .....                  | 3.4    | Low          |
| PLAT969_ALERT_5_G | The 'Henn et al.' R-Factor-gap value .....                  | 1.689  | Note         |
|                   | Predicted wR2: Based on SigI**2 14.23 or SHELX Weight 22.05 |        |              |
| PLAT978_ALERT_2_G | Number C-C Bonds with Positive Residual Density.            | 0      | Info         |

2 **ALERT level A** = Most likely a serious problem - resolve or explain  
 2 **ALERT level B** = A potentially serious problem, consider carefully  
 19 **ALERT level C** = Check. Ensure it is not caused by an omission or oversight  
 18 **ALERT level G** = General information/check it is not something unexpected

0 ALERT type 1 CIF construction/syntax error, inconsistent or missing data  
 18 ALERT type 2 Indicator that the structure model may be wrong or deficient  
 12 ALERT type 3 Indicator that the structure quality may be low  
 6 ALERT type 4 Improvement, methodology, query or suggestion  
 5 ALERT type 5 Informative message, check

It is advisable to attempt to resolve as many as possible of the alerts in all categories. Often the minor alerts point to easily fixed oversights, errors and omissions in your CIF or refinement strategy, so attention to these fine details can be worthwhile. In order to resolve some of the more serious problems it may be necessary to carry out additional measurements or structure refinements. However, the purpose of your study may justify the reported deviations and the more serious of these should normally be commented upon in the discussion or experimental section of a paper or in the "special\_details" fields of the CIF. checkCIF was carefully designed to identify outliers and unusual parameters, but every test has its limitations and alerts that are not important in a particular case may appear. Conversely, the absence of alerts does not guarantee there are no aspects of the results needing attention. It is up to the individual to critically assess their own results and, if necessary, seek expert advice.

### **Publication of your CIF in IUCr journals**

A basic structural check has been run on your CIF. These basic checks will be run on all CIFs submitted for publication in IUCr journals (*Acta Crystallographica*, *Journal of Applied Crystallography*, *Journal of Synchrotron Radiation*); however, if you intend to submit to *Acta Crystallographica Section C* or *E* or *IUCrData*, you should make sure that full publication checks are run on the final version of your CIF prior to submission.

### **Publication of your CIF in other journals**

Please refer to the *Notes for Authors* of the relevant journal for any special instructions relating to CIF submission.

Datablock 1 - ellipsoid plot

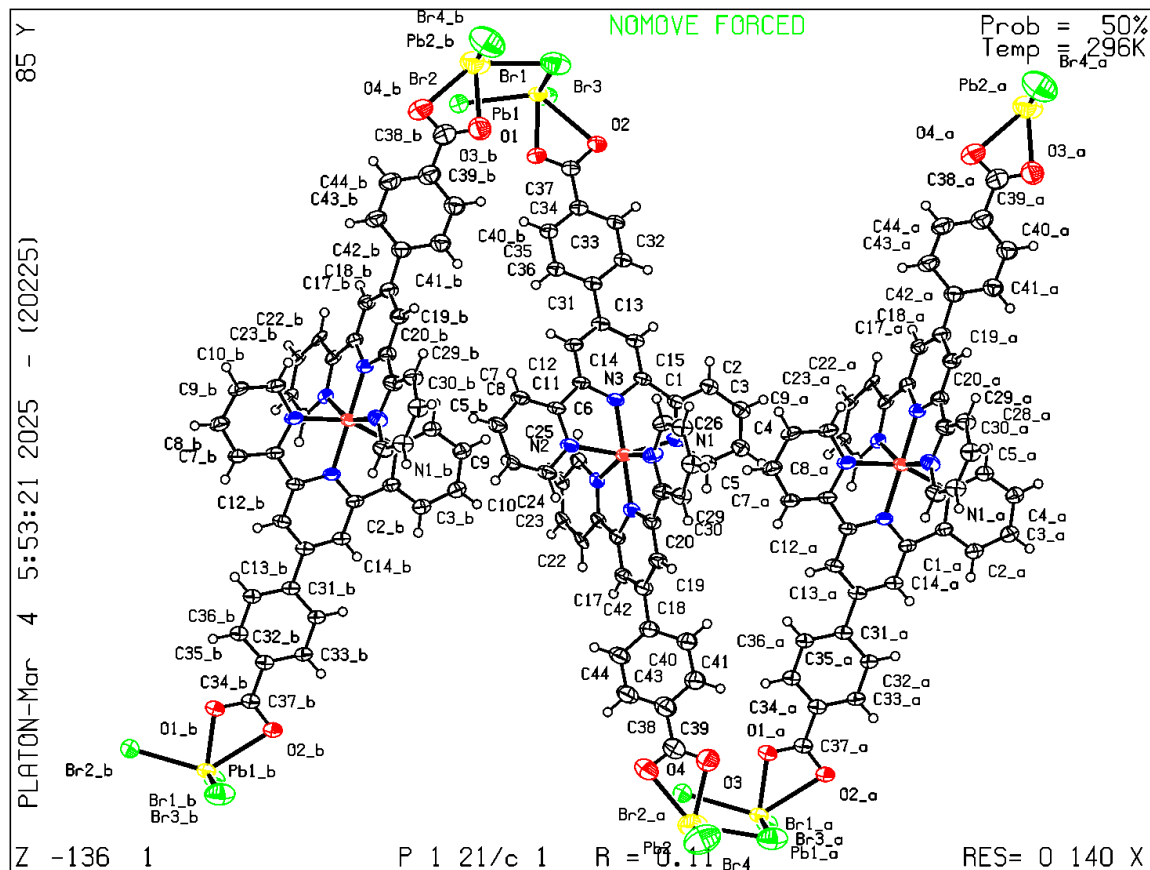

Supplement: Supplementary file 2 [file 92a29f69d1a1062b335edfad.pdf]
