# Supplementary material for: Near-Infrared-Responsive Single-Component Hybrid Lead Halides for Photocatalytic C2 Hydrocarbon Production from CO2
Source: Research Square preprint supplement (doi:10.21203/rs.3.rs-6443657/v1), 2025-06-18

## checkCIF/PLATON report

Structure factors have been supplied for datablock(s) 1208\_a

THIS REPORT IS FOR GUIDANCE ONLY. IF USED AS PART OF A REVIEW PROCEDURE FOR PUBLICATION, IT SHOULD NOT REPLACE THE EXPERTISE OF AN EXPERIENCED CRYSTALLOGRAPHIC REFEREE.

No syntax errors found.      CIF dictionary      Interpreting this report

### Datablock: 1208\_a

---

Bond precision:      C-C = 0.0160 Å

Wavelength=0.71073

Cell:                      a=12.094(3)                      b=12.656(3)                      c=16.868(4)  
                              alpha=84.788(7)                      beta=88.519(7)                      gamma=82.676(7)  
Temperature:              289 K

|                        | Calculated              | Reported                   |
|------------------------|-------------------------|----------------------------|
| Volume                 | 2549.9(11)              | 2549.9(9)                  |
| Space group            | P -1                    | P -1                       |
| Hall group             | -P 1                    | -P 1                       |
| Moiety formula         | C47 H35 I4 N7 Ni O5 Pb2 | C47 H35 I3 N7 Ni O5 Pb2, I |
| Sum formula            | C47 H35 I4 N7 Ni O5 Pb2 | C47 H35 I4 N7 Ni O5 Pb2    |
| Mr                     | 1758.51                 | 1758.51                    |
| Dx, g cm <sup>-3</sup> | 2.290                   | 2.290                      |
| Z                      | 2                       | 2                          |
| Mu (mm <sup>-1</sup> ) | 9.424                   | 9.424                      |
| F000                   | 1620.0                  | 1620.0                     |
| F000'                  | 1604.45                 |                            |
| h,k,lmax               | 13,14,18                | 13,14,18                   |
| Nref                   | 7382                    | 7348                       |
| Tmin,Tmax              | 0.265,0.243             | 0.580,0.745                |
| Tmin'                  | 0.223                   |                            |

Correction method= # Reported T Limits: Tmin=0.580 Tmax=0.745  
AbsCorr = MULTI-SCAN

Data completeness= 0.995

Theta(max)= 23.317

R(reflections)= 0.0481( 5979)

wR2(reflections)=  
0.1128( 7348)

S = 1.037

Npar= 601

---

The following ALERTS were generated. Each ALERT has the format

**test-name\_ALERT\_alert-type\_alert-level.**

Click on the hyperlinks for more details of the test.

---

### Alert level B

THETM01\_ALERT\_3\_B The value of sine(theta\_max)/wavelength is less than 0.575  
Calculated sin(theta\_max)/wavelength = 0.5569  
PLAT910\_ALERT\_3\_B Missing # of FCF Reflection(s) Below Theta(Min). 11 Note  
1 0 0, -1 1 0, 0 1 0, 1 1 0, 0 -1 1, -1 0 1,  
0 0 1, 1 0 1, 0 1 1, 1 1 1, 0 0 2,

---

### Alert level C

PLAT042\_ALERT\_1\_C Calc. and Reported MoietyFormula Strings Differ Please Check  
Calc: C47 H35 I4 N7 Ni O5 Pb2  
Rep.: C47 H35 I3 N7 Ni O5 Pb2, I  
PLAT220\_ALERT\_2\_C NonSolvent Resd 1 C Ueq(max)/Ueq(min) Range 4.8 Ratio  
PLAT220\_ALERT\_2\_C NonSolvent Resd 1 N Ueq(max)/Ueq(min) Range 3.5 Ratio  
PLAT222\_ALERT\_3\_C NonSolvent Resd 1 H Uiso(max)/Uiso(min) Range 5.5 Ratio  
PLAT241\_ALERT\_2\_C High 'MainMol' Ueq as Compared to Neighbors of I1 Check  
PLAT241\_ALERT\_2\_C High 'MainMol' Ueq as Compared to Neighbors of O2 Check  
PLAT242\_ALERT\_2\_C Low 'MainMol' Ueq as Compared to Neighbors of Pb3 Check  
PLAT242\_ALERT\_2\_C Low 'MainMol' Ueq as Compared to Neighbors of N3 Check  
PLAT342\_ALERT\_3\_C Low Bond Precision on C-C Bonds ..... 0.01598 Ang.  
PLAT911\_ALERT\_3\_C Missing FCF Refl Between Thmin & STh/L= 0.557 22 Report  
-10 8 0, -10 8 1, -7 11 1, -13 1 3, -13 0 4, -12 4 4,  
-5 12 5, 1 -3 6, 12 -2 7, -12 -2 8, 12 5 8, 4 13 8,  
6 12 9, 10 7 11, 0 12 11, -10 1 12, 1 11 13, 2 11 13,  
9 0 14, 0 7 17, 2 7 17, 2 5 18,  
PLAT971\_ALERT\_2\_C Check Calcd Resid. Dens. 1.19Ang From I2 1.59 eA-3  
PLAT972\_ALERT\_2\_C Check Calcd Resid. Dens. 0.70Ang From I3 -2.23 eA-3  
PLAT972\_ALERT\_2\_C Check Calcd Resid. Dens. 0.68Ang From I3 -2.21 eA-3  
PLAT972\_ALERT\_2\_C Check Calcd Resid. Dens. 0.80Ang From I2 -2.11 eA-3  
PLAT972\_ALERT\_2\_C Check Calcd Resid. Dens. 0.65Ang From I3 -2.09 eA-3  
PLAT972\_ALERT\_2\_C Check Calcd Resid. Dens. 0.57Ang From I2 -1.95 eA-3  
PLAT972\_ALERT\_2\_C Check Calcd Resid. Dens. 0.61Ang From I2 -1.92 eA-3  
PLAT972\_ALERT\_2\_C Check Calcd Resid. Dens. 0.63Ang From I2 -1.77 eA-3  
PLAT972\_ALERT\_2\_C Check Calcd Resid. Dens. 0.58Ang From I3 -1.67 eA-3

---

### Alert level G

PLAT003\_ALERT\_2\_G Number of Uiso or U(i,j) Restrained non-H Atoms 66 Report  
PLAT004\_ALERT\_5\_G Polymeric Structure Found with Maximum Dimension 1 Info  
PLAT083\_ALERT\_2\_G SHELXL Second Parameter in WGHT Unusually Large 50.00 Why ?  
PLAT152\_ALERT\_1\_G The Supplied and Calc. Volume s.u. Differ by ... 2 Units  
PLAT154\_ALERT\_1\_G The s.u.'s on the Cell Angles are Equal ..(Note) 0.007 Degree  
PLAT171\_ALERT\_4\_G The CIF-Embedded .res File Contains EADP Records 1 Report  
PLAT177\_ALERT\_4\_G The CIF-Embedded .res File Contains DELU Records 1 Report  
PLAT178\_ALERT\_4\_G The CIF-Embedded .res File Contains SIMU Records 1 Report  
PLAT188\_ALERT\_3\_G A Non-default SIMU Restraint Value has been used 0.0100 Report  
PLAT232\_ALERT\_2\_G Hirshfeld Test Diff (M-X) Pb1 --I1 . 22.3 s.u.  
PLAT232\_ALERT\_2\_G Hirshfeld Test Diff (M-X) Pb1 --I2 . 40.9 s.u.  
PLAT232\_ALERT\_2\_G Hirshfeld Test Diff (M-X) Pb1 --I4\_a . 54.5 s.u.  
PLAT232\_ALERT\_2\_G Hirshfeld Test Diff (M-X) Pb3 --I3 . 23.7 s.u.

|                   |                                                  |       |                 |       |             |
|-------------------|--------------------------------------------------|-------|-----------------|-------|-------------|
| PLAT232_ALERT_2_G | Hirshfeld Test Diff (M-X)                        | Pb3   | --I2_b          | .     | 27.4 s.u.   |
| PLAT232_ALERT_2_G | Hirshfeld Test Diff (M-X)                        | Pb2   | --I1            | .     | 28.4 s.u.   |
| PLAT232_ALERT_2_G | Hirshfeld Test Diff (M-X)                        | Pb2   | --I2            | .     | 48.2 s.u.   |
| PLAT232_ALERT_2_G | Hirshfeld Test Diff (M-X)                        | Pb2   | --I4_a          | .     | 61.2 s.u.   |
| PLAT301_ALERT_3_G | Main Residue Disorder .....                      | (Resd | 1)              |       | 2% Note     |
| PLAT794_ALERT_5_G | Tentative Bond Valency for Pb3                   | (II)  | .               |       | 2.04 Info   |
| PLAT794_ALERT_5_G | Tentative Bond Valency for Nil                   | (II)  | .               |       | 2.23 Info   |
| PLAT804_ALERT_5_G | Number of ARU-Code Packing Problem(s) in PLATON  |       |                 |       | 14 Info     |
| PLAT860_ALERT_3_G | Number of Least-Squares Restraints .....         |       |                 |       | 615 Note    |
| PLAT883_ALERT_1_G | No Info/Value for _atom_sites_solution_primary   |       |                 |       | Please Do ! |
| PLAT909_ALERT_3_G | Percentage of I>2sig(I) Data at Theta(Max) Still |       |                 |       | 57% Note    |
| PLAT933_ALERT_2_G | Number of HKL-OMIT Records in Embedded .res File |       |                 |       | 1 Note      |
|                   | 1 -3 6,                                          |       |                 |       |             |
| PLAT969_ALERT_5_G | The 'Henn et al.' R-Factor-gap value .....       |       |                 |       | 2.809 Note  |
|                   | Predicted wR2: Based on SigI**2                  | 4.02  | or SHELX Weight | 10.88 |             |
| PLAT978_ALERT_2_G | Number C-C Bonds with Positive Residual Density. |       |                 |       | 0 Info      |

---

0 **ALERT level A** = Most likely a serious problem - resolve or explain  
 2 **ALERT level B** = A potentially serious problem, consider carefully  
 19 **ALERT level C** = Check. Ensure it is not caused by an omission or oversight  
 27 **ALERT level G** = General information/check it is not something unexpected

4 ALERT type 1 CIF construction/syntax error, inconsistent or missing data  
 27 ALERT type 2 Indicator that the structure model may be wrong or deficient  
 9 ALERT type 3 Indicator that the structure quality may be low  
 3 ALERT type 4 Improvement, methodology, query or suggestion  
 5 ALERT type 5 Informative message, check

---

It is advisable to attempt to resolve as many as possible of the alerts in all categories. Often the minor alerts point to easily fixed oversights, errors and omissions in your CIF or refinement strategy, so attention to these fine details can be worthwhile. In order to resolve some of the more serious problems it may be necessary to carry out additional measurements or structure refinements. However, the purpose of your study may justify the reported deviations and the more serious of these should normally be commented upon in the discussion or experimental section of a paper or in the "special\_details" fields of the CIF. checkCIF was carefully designed to identify outliers and unusual parameters, but every test has its limitations and alerts that are not important in a particular case may appear. Conversely, the absence of alerts does not guarantee there are no aspects of the results needing attention. It is up to the individual to critically assess their own results and, if necessary, seek expert advice.

### **Publication of your CIF in IUCr journals**

A basic structural check has been run on your CIF. These basic checks will be run on all CIFs submitted for publication in IUCr journals (*Acta Crystallographica*, *Journal of Applied Crystallography*, *Journal of Synchrotron Radiation*); however, if you intend to submit to *Acta Crystallographica Section C* or *E* or *IUCrData*, you should make sure that full publication checks are run on the final version of your CIF prior to submission.

### **Publication of your CIF in other journals**

Please refer to the *Notes for Authors* of the relevant journal for any special instructions relating to CIF submission.

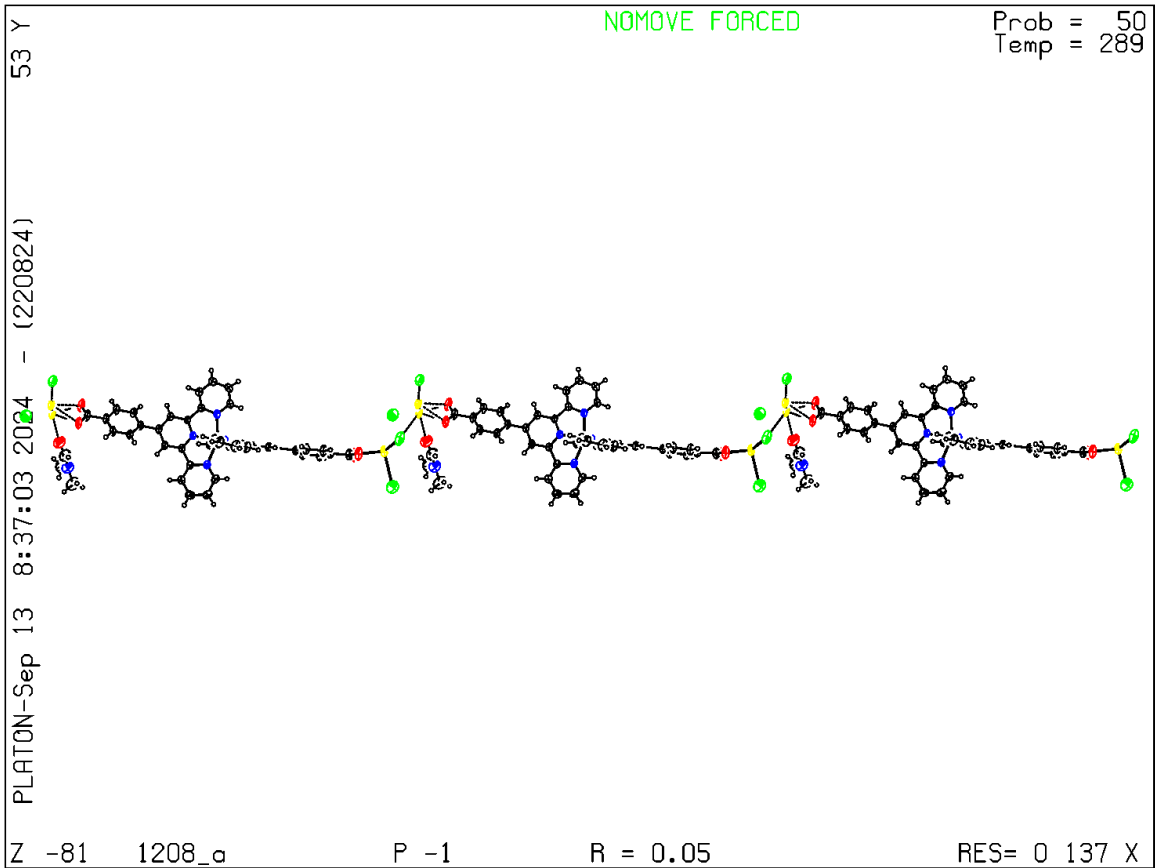

## checkCIF/PLATON report

Structure factors have been supplied for datablock(s) mo\_231208c\_0m

THIS REPORT IS FOR GUIDANCE ONLY. IF USED AS PART OF A REVIEW PROCEDURE FOR PUBLICATION, IT SHOULD NOT REPLACE THE EXPERTISE OF AN EXPERIENCED CRYSTALLOGRAPHIC REFEREE.

No syntax errors found.      CIF dictionary      Interpreting this report

### Datablock: mo\_231208c\_0m

---

Bond precision:      C-C = 0.0101 Å

Wavelength=0.71076

Cell:                      a=12.0479(12)                      b=12.6442(10)                      c=16.8631(15)  
                              alpha=84.801(4)                      beta=88.484(2)                      gamma=82.612(2)  
Temperature:              289 K

|                        | Calculated              | Reported                   |
|------------------------|-------------------------|----------------------------|
| Volume                 | 2536.8(4)               | 2536.8(4)                  |
| Space group            | P -1                    | P -1                       |
| Hall group             | -P 1                    | -P 1                       |
| Moiety formula         | C47 H35 Co I4 N7 O5 Pb2 | C47 H35 Co I3 N7 O5 Pb2, I |
| Sum formula            | C47 H35 Co I4 N7 O5 Pb2 | C47 H35 Co I4 N7 O5 Pb2    |
| Mr                     | 1758.75                 | 1758.73                    |
| Dx, g cm <sup>-3</sup> | 2.303                   | 2.302                      |
| Z                      | 2                       | 2                          |
| Mu (mm <sup>-1</sup> ) | 9.429                   | 9.429                      |
| F000                   | 1618.0                  | 1618.0                     |
| F000'                  | 1602.47                 |                            |
| h,k,lmax               | 14,14,19                | 14,14,19                   |
| Nref                   | 8676                    | 8656                       |
| Tmin,Tmax              | 0.265,0.243             | 0.432,0.745                |
| Tmin'                  | 0.223                   |                            |

Correction method= # Reported T Limits: Tmin=0.432 Tmax=0.745  
AbsCorr = MULTI-SCAN

Data completeness= 0.998

Theta(max)= 24.738

R(reflections)= 0.0338( 7378)

wR2(reflections)=  
0.0711( 8656)

S = 1.030

Npar= 597

---

The following ALERTS were generated. Each ALERT has the format

**test-name\_ALERT\_alert-type\_alert-level.**

Click on the hyperlinks for more details of the test.

---

### Alert level B

PLAT910\_ALERT\_3\_B Missing # of FCF Reflection(s) Below Theta(Min). 11 Note  
1 0 0, -1 1 0, 0 1 0, 1 1 0, 0 -1 1, -1 0 1,  
0 0 1, 1 0 1, 0 1 1, 1 1 1, 0 0 2,

---

### Alert level C

RADNW01\_ALERT\_1\_C The radiation wavelength lies outside the expected range  
for the supplied radiation type. Expected range 0.71065-0.71075  
Wavelength given = 0.71076  
THETM01\_ALERT\_3\_C The value of sine(theta\_max)/wavelength is less than 0.590  
Calculated sin(theta\_max)/wavelength = 0.5888  
PLAT042\_ALERT\_1\_C Calc. and Reported MoietyFormula Strings Differ Please Check  
Calc: C47 H35 Co I4 N7 O5 Pb2  
Rep.: C47 H35 Co I3 N7 O5 Pb2, I  
PLAT220\_ALERT\_2\_C NonSolvent Resd 1 C Ueq(max)/Ueq(min) Range 4.8 Ratio  
PLAT222\_ALERT\_3\_C NonSolvent Resd 1 H Uiso(max)/Uiso(min) Range 5.6 Ratio  
PLAT241\_ALERT\_2\_C High 'MainMol' Ueq as Compared to Neighbors of 01 Check  
PLAT241\_ALERT\_2\_C High 'MainMol' Ueq as Compared to Neighbors of 04 Check  
PLAT242\_ALERT\_2\_C Low 'MainMol' Ueq as Compared to Neighbors of Pb1 Check  
PLAT242\_ALERT\_2\_C Low 'MainMol' Ueq as Compared to Neighbors of Pb2 Check  
PLAT242\_ALERT\_2\_C Low 'MainMol' Ueq as Compared to Neighbors of N7 Check  
PLAT342\_ALERT\_3\_C Low Bond Precision on C-C Bonds ..... 0.01007 Ang.  
PLAT911\_ALERT\_3\_C Missing FCF Refl Between Thmin & STh/L= 0.589 10 Report  
-13 4 2, -10 9 3, -5 13 4, -4 13 7, -11 -7 9, -9 0 15,  
-4 9 15, -6 6 16, -7 0 17, 6 4 18,  
PLAT972\_ALERT\_2\_C Check Calcd Resid. Dens. 0.73Ang From I4 -2.09 eA-3  
PLAT972\_ALERT\_2\_C Check Calcd Resid. Dens. 0.61Ang From I4 -1.83 eA-3  
PLAT972\_ALERT\_2\_C Check Calcd Resid. Dens. 0.53Ang From I4 -1.76 eA-3  
PLAT972\_ALERT\_2\_C Check Calcd Resid. Dens. 0.79Ang From I2 -1.69 eA-3  
PLAT972\_ALERT\_2\_C Check Calcd Resid. Dens. 0.55Ang From I2 -1.64 eA-3  
PLAT972\_ALERT\_2\_C Check Calcd Resid. Dens. 0.78Ang From I2 -1.62 eA-3

---

### Alert level G

PLAT003\_ALERT\_2\_G Number of Uiso or U(i,j) Restrained non-H Atoms 65 Report  
PLAT004\_ALERT\_5\_G Polymeric Structure Found with Maximum Dimension 1 Info  
PLAT083\_ALERT\_2\_G SHELXL Second Parameter in WGHT Unusually Large 20.00 Why ?  
PLAT177\_ALERT\_4\_G The CIF-Embedded .res File Contains DELU Records 1 Report  
PLAT178\_ALERT\_4\_G The CIF-Embedded .res File Contains SIMU Records 1 Report  
PLAT188\_ALERT\_3\_G A Non-default SIMU Restraint Value has been used 0.0100 Report  
PLAT232\_ALERT\_2\_G Hirshfeld Test Diff (M-X) Pb1 --I1 . 17.5 s.u.  
PLAT232\_ALERT\_2\_G Hirshfeld Test Diff (M-X) Pb1 --I4 . 60.0 s.u.  
PLAT232\_ALERT\_2\_G Hirshfeld Test Diff (M-X) Pb1 --I3\_b . 91.0 s.u.  
PLAT232\_ALERT\_2\_G Hirshfeld Test Diff (M-X) Pb2 --I2 . 26.2 s.u.  
PLAT232\_ALERT\_2\_G Hirshfeld Test Diff (M-X) Pb2 --I3 . 11.8 s.u.  
PLAT232\_ALERT\_2\_G Hirshfeld Test Diff (M-X) Pb2 --I4\_a . 34.4 s.u.  
PLAT794\_ALERT\_5\_G Tentative Bond Valency for Pb1 (II) . 1.92 Info  
PLAT794\_ALERT\_5\_G Tentative Bond Valency for Pb2 (II) . 2.04 Info  
PLAT794\_ALERT\_5\_G Tentative Bond Valency for Co1 (III) . 2.78 Info

|                   |                                                      |       |      |
|-------------------|------------------------------------------------------|-------|------|
| PLAT804_ALERT_5_G | Number of ARU-Code Packing Problem(s) in PLATON      | 10    | Info |
| PLAT860_ALERT_3_G | Number of Least-Squares Restraints .....             | 606   | Note |
| PLAT909_ALERT_3_G | Percentage of I>2sig(I) Data at Theta(Max) Still     | 65%   | Note |
| PLAT969_ALERT_5_G | The 'Henn et al.' R-Factor-gap value .....           | 2.712 | Note |
|                   | Predicted wR2: Based on SigI**2 2.62 or SHELX Weight | 6.90  |      |
| PLAT978_ALERT_2_G | Number C-C Bonds with Positive Residual Density.     | 0     | Info |

---

0 **ALERT level A** = Most likely a serious problem - resolve or explain  
 1 **ALERT level B** = A potentially serious problem, consider carefully  
 18 **ALERT level C** = Check. Ensure it is not caused by an omission or oversight  
 20 **ALERT level G** = General information/check it is not something unexpected

2 ALERT type 1 CIF construction/syntax error, inconsistent or missing data  
 21 ALERT type 2 Indicator that the structure model may be wrong or deficient  
 8 ALERT type 3 Indicator that the structure quality may be low  
 2 ALERT type 4 Improvement, methodology, query or suggestion  
 6 ALERT type 5 Informative message, check

---

It is advisable to attempt to resolve as many as possible of the alerts in all categories. Often the minor alerts point to easily fixed oversights, errors and omissions in your CIF or refinement strategy, so attention to these fine details can be worthwhile. In order to resolve some of the more serious problems it may be necessary to carry out additional measurements or structure refinements. However, the purpose of your study may justify the reported deviations and the more serious of these should normally be commented upon in the discussion or experimental section of a paper or in the "special\_details" fields of the CIF. checkCIF was carefully designed to identify outliers and unusual parameters, but every test has its limitations and alerts that are not important in a particular case may appear. Conversely, the absence of alerts does not guarantee there are no aspects of the results needing attention. It is up to the individual to critically assess their own results and, if necessary, seek expert advice.

### Publication of your CIF in IUCr journals

A basic structural check has been run on your CIF. These basic checks will be run on all CIFs submitted for publication in IUCr journals (*Acta Crystallographica*, *Journal of Applied Crystallography*, *Journal of Synchrotron Radiation*); however, if you intend to submit to *Acta Crystallographica Section C* or *E* or *IUCrData*, you should make sure that full publication checks are run on the final version of your CIF prior to submission.

### Publication of your CIF in other journals

Please refer to the *Notes for Authors* of the relevant journal for any special instructions relating to CIF submission.



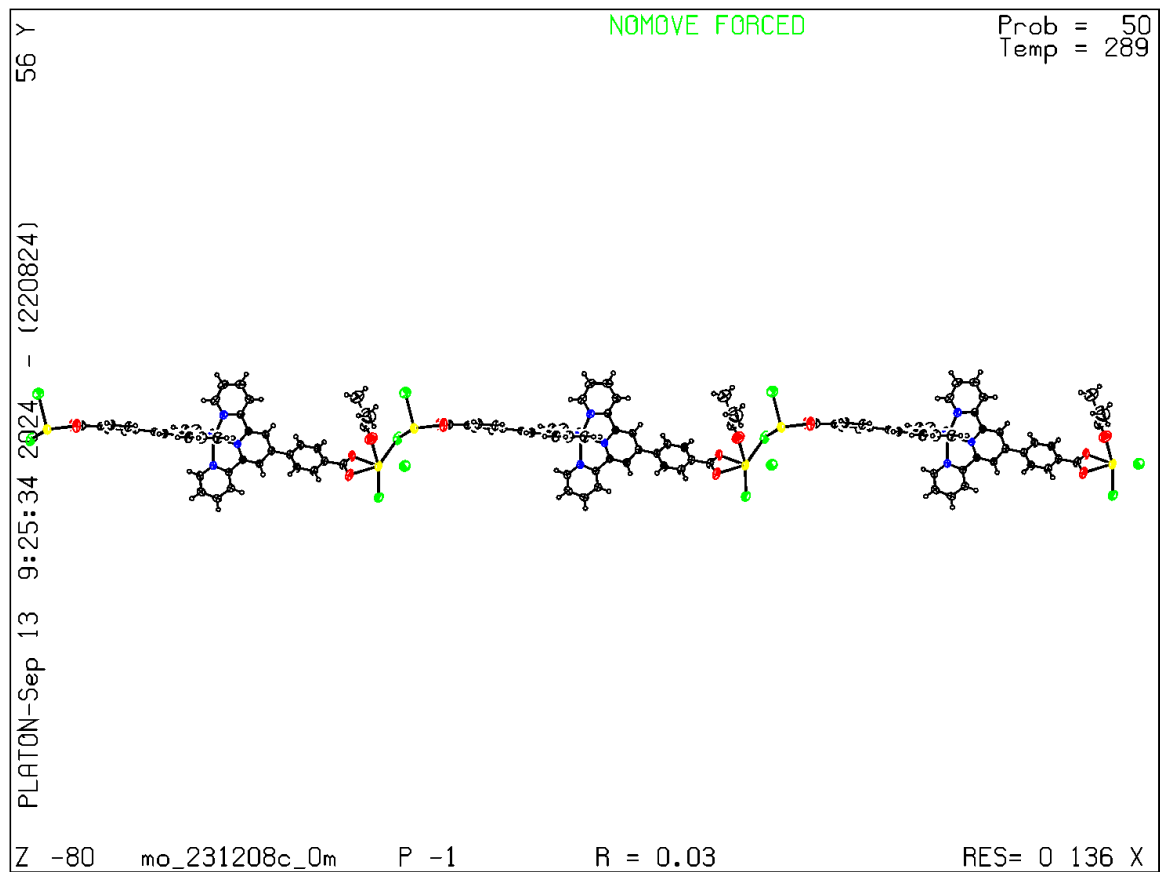

## checkCIF/PLATON report

You have not supplied any structure factors. As a result the full set of tests cannot be run.

THIS REPORT IS FOR GUIDANCE ONLY. IF USED AS PART OF A REVIEW PROCEDURE FOR PUBLICATION, IT SHOULD NOT REPLACE THE EXPERTISE OF AN EXPERIENCED CRYSTALLOGRAPHIC REFEREE.

No syntax errors found.      CIF dictionary      Interpreting this report

### Datablock: mo\_231129b\_01m\_a

---

Bond precision:      C-C = 0.0170 Å

Wavelength=0.71073

Cell:                      a=12.295(3)                      b=12.487(3)                      c=16.692(4)  
                              alpha=85.561(8)                      beta=87.022(9)                      gamma=81.497(9)  
Temperature:              278 K

|                        | Calculated              | Reported                   |
|------------------------|-------------------------|----------------------------|
| Volume                 | 2524.8(11)              | 2524.8(11)                 |
| Space group            | P -1                    | P -1                       |
| Hall group             | -P 1                    | -P 1                       |
| Moiety formula         | C47 H35 Fe I4 N7 O5 Pb2 | C47 H35 Fe I3 N7 O5 Pb2, I |
| Sum formula            | C47 H35 Fe I4 N7 O5 Pb2 | C47 H35 Fe I4 N7 O5 Pb2    |
| Mr                     | 1755.67                 | 1755.65                    |
| Dx, g cm <sup>-3</sup> | 2.309                   | 2.309                      |
| Z                      | 2                       | 2                          |
| Mu (mm <sup>-1</sup> ) | 9.432                   | 9.432                      |
| F000                   | 1616.0                  | 1616.0                     |
| F000'                  | 1600.46                 |                            |
| h,k,lmax               | 14,14,19                | 14,14,19                   |
| Nref                   | 8614                    | 8602                       |
| Tmin,Tmax              | 0.265,0.243             | 0.378,0.746                |
| Tmin'                  | 0.223                   |                            |

Correction method= # Reported T Limits: Tmin=0.378 Tmax=0.746  
AbsCorr = MULTI-SCAN

Data completeness= 0.999

Theta(max)= 24.707

R(reflections)= 0.0573( 5859)

wR2(reflections)=  
0.1326( 8602)

S = 1.071

Npar= 597

---

The following ALERTS were generated. Each ALERT has the format

**test-name\_ALERT\_alert-type\_alert-level.**

Click on the hyperlinks for more details of the test.

---

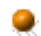

#### Alert level B

RINTA01\_ALERT\_3\_B The value of Rint is greater than 0.18  
Rint given 0.230

---

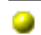

#### Alert level C

THETM01\_ALERT\_3\_C The value of sine(theta\_max)/wavelength is less than 0.590  
Calculated sin(theta\_max)/wavelength = 0.5881  
PLAT042\_ALERT\_1\_C Calc. and Reported MoietyFormula Strings Differ Please Check  
Calc: C47 H35 Fe I4 N7 O5 Pb2  
Rep.: C47 H35 Fe I3 N7 O5 Pb2, I  
PLAT220\_ALERT\_2\_C NonSolvent Resd 1 C Ueq(max)/Ueq(min) Range 4.8 Ratio  
PLAT220\_ALERT\_2\_C NonSolvent Resd 1 N Ueq(max)/Ueq(min) Range 3.5 Ratio  
PLAT222\_ALERT\_3\_C NonSolvent Resd 1 H Uiso(max)/Uiso(min) Range 5.3 Ratio  
PLAT241\_ALERT\_2\_C High 'MainMol' Ueq as Compared to Neighbors of O1 Check  
PLAT242\_ALERT\_2\_C Low 'MainMol' Ueq as Compared to Neighbors of Pb1 Check  
PLAT242\_ALERT\_2\_C Low 'MainMol' Ueq as Compared to Neighbors of Pb2 Check  
PLAT242\_ALERT\_2\_C Low 'MainMol' Ueq as Compared to Neighbors of N1 Check  
PLAT342\_ALERT\_3\_C Low Bond Precision on C-C Bonds ..... 0.017 Ang.

---

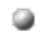

#### Alert level G

PLAT003\_ALERT\_2\_G Number of Uiso or U(i,j) Restrained non-H-Atoms 65 Report  
PLAT004\_ALERT\_5\_G Polymeric Structure Found with Maximum Dimension 1 Info  
PLAT020\_ALERT\_3\_G The Value of Rint is Greater Than 0.12 ..... 0.230 Report  
PLAT083\_ALERT\_2\_G SHELXL Second Parameter in WGHT Unusually Large 30.00 Why ?  
PLAT177\_ALERT\_4\_G The CIF-Embedded .res File Contains DELU Records 1 Report  
PLAT178\_ALERT\_4\_G The CIF-Embedded .res File Contains SIMU Records 1 Report  
PLAT188\_ALERT\_3\_G A Non-default SIMU Restraint Value has been used 0.0100 Report  
PLAT232\_ALERT\_2\_G Hirshfeld Test Diff (M-X) Pb1 --I05 . 10.9 s.u.  
PLAT232\_ALERT\_2\_G Hirshfeld Test Diff (M-X) Pb1 --I07 . 51.4 s.u.  
PLAT232\_ALERT\_2\_G Hirshfeld Test Diff (M-X) Pb1 --I2\_b . 39.4 s.u.  
PLAT232\_ALERT\_2\_G Hirshfeld Test Diff (M-X) Pb2 --I0B . 21.5 s.u.  
PLAT232\_ALERT\_2\_G Hirshfeld Test Diff (M-X) Pb2 --I2 . 16.2 s.u.  
PLAT720\_ALERT\_4\_G Number of Unusual/Non-Standard Labels ..... 3 Note  
I0B I05 I07  
PLAT721\_ALERT\_1\_G Bond Calc 0.97000, Rep 0.96000 Dev... 0.01 Ang.  
C47 -H47C 1\_555 1\_555 ..... # 113 Check  
PLAT721\_ALERT\_1\_G Bond Calc 0.97000, Rep 0.96000 Dev... 0.01 Ang.  
C48 -H48C 1\_555 1\_555 ..... # 116 Check  
PLAT794\_ALERT\_5\_G Tentative Bond Valency for Pb1 (II) . 1.88 Info  
PLAT794\_ALERT\_5\_G Tentative Bond Valency for Pb2 (II) . 2.01 Info  
PLAT804\_ALERT\_5\_G Number of ARU-Code Packing Problem(s) in PLATON 11 Info  
PLAT860\_ALERT\_3\_G Number of Least-Squares Restraints ..... 631 Note  
PLAT883\_ALERT\_1\_G Absent Datum for \_atom\_sites\_solution\_primary .. Please Do !  
PLAT933\_ALERT\_2\_G Number of HKL-OMIT Records in Embedded .res File 2 Note  
-2 -1 3, -1 1 0,

---

0 **ALERT level A** = Most likely a serious problem - resolve or explain

1 **ALERT level B** = A potentially serious problem, consider carefully  
10 **ALERT level C** = Check. Ensure it is not caused by an omission or oversight  
21 **ALERT level G** = General information/check it is not something unexpected

4 ALERT type 1 CIF construction/syntax error, inconsistent or missing data  
14 ALERT type 2 Indicator that the structure model may be wrong or deficient  
7 ALERT type 3 Indicator that the structure quality may be low  
3 ALERT type 4 Improvement, methodology, query or suggestion  
4 ALERT type 5 Informative message, check

---

It is advisable to attempt to resolve as many as possible of the alerts in all categories. Often the minor alerts point to easily fixed oversights, errors and omissions in your CIF or refinement strategy, so attention to these fine details can be worthwhile. In order to resolve some of the more serious problems it may be necessary to carry out additional measurements or structure refinements. However, the purpose of your study may justify the reported deviations and the more serious of these should normally be commented upon in the discussion or experimental section of a paper or in the "special\_details" fields of the CIF. checkCIF was carefully designed to identify outliers and unusual parameters, but every test has its limitations and alerts that are not important in a particular case may appear. Conversely, the absence of alerts does not guarantee there are no aspects of the results needing attention. It is up to the individual to critically assess their own results and, if necessary, seek expert advice.

### **Publication of your CIF in IUCr journals**

A basic structural check has been run on your CIF. These basic checks will be run on all CIFs submitted for publication in IUCr journals (*Acta Crystallographica*, *Journal of Applied Crystallography*, *Journal of Synchrotron Radiation*); however, if you intend to submit to *Acta Crystallographica Section C* or *E* or *IUCrData*, you should make sure that full publication checks are run on the final version of your CIF prior to submission.

### **Publication of your CIF in other journals**

Please refer to the *Notes for Authors* of the relevant journal for any special instructions relating to CIF submission.

---

Datablock mo\_231129b\_01m\_a - ellipsoid plot

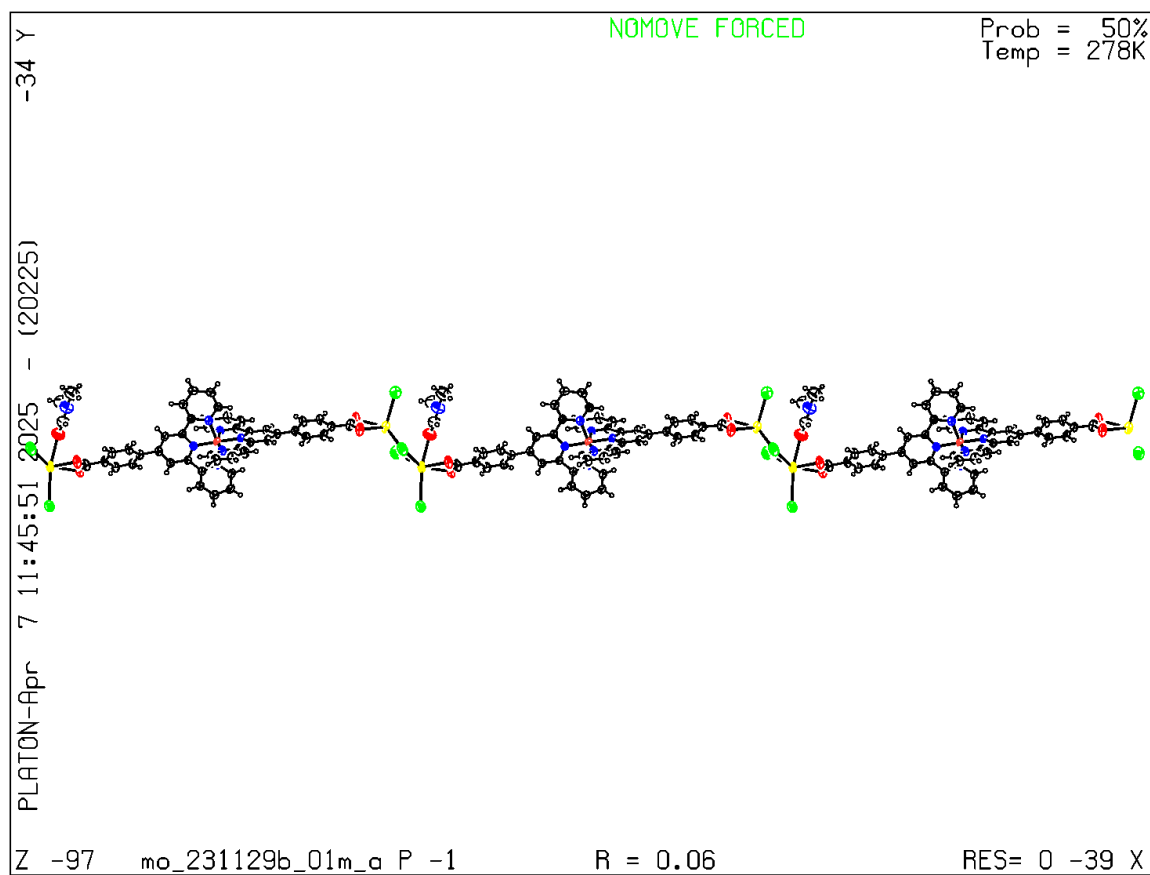

Supplement: Supplementary file 1 [file 0809ffc3a8e8b843596f8366.pdf]
