# Supplementary material for: Near-Infrared-Responsive Single-Component Hybrid Lead Halides for Photocatalytic C2 Hydrocarbon Production from CO2
Source: Research Square preprint supplement (doi:10.21203/rs.3.rs-6443657/v1), 2025-06-18

## checkCIF/PLATON report

You have not supplied any structure factors. As a result the full set of tests cannot be run.

THIS REPORT IS FOR GUIDANCE ONLY. IF USED AS PART OF A REVIEW PROCEDURE FOR PUBLICATION, IT SHOULD NOT REPLACE THE EXPERTISE OF AN EXPERIENCED CRYSTALLOGRAPHIC REFEREE.

No syntax errors found.      CIF dictionary      Interpreting this report

### Datablock: 1025

---

|                        |                                         |                          |              |
|------------------------|-----------------------------------------|--------------------------|--------------|
| Bond precision:        | C-C = 0.0176 Å                          | Wavelength=0.71073       |              |
| Cell:                  | a=12.706 (6)                            | b=17.590 (8)             | c=19.196 (9) |
|                        | alpha=90                                | beta=94.703 (18)         | gamma=90     |
| Temperature:           | 283 K                                   |                          |              |
|                        | Calculated                              | Reported                 |              |
| Volume                 | 4276 (3)                                | 4276 (3)                 |              |
| Space group            | P 21/c                                  | P 1 21/c 1               |              |
| Hall group             | -P 2ybc                                 | -P 2ybc                  |              |
| Moiety formula         | C44 H28 Cl4 Co N6 O4 Pb2 [+<br>solvent] | C44 H28 Cl4 Co N6 O4 Pb2 |              |
| Sum formula            | C44 H28 Cl4 Co N6 O4 Pb2 [+<br>solvent] | C44 H28 Cl4 Co N6 O4 Pb2 |              |
| Mr                     | 1319.86                                 | 1319.83                  |              |
| Dx, g cm <sup>-3</sup> | 2.050                                   | 2.050                    |              |
| Z                      | 4                                       | 4                        |              |
| Mu (mm <sup>-1</sup> ) | 8.540                                   | 8.541                    |              |
| F000                   | 2500.0                                  | 2500.0                   |              |
| F000'                  | 2478.34                                 |                          |              |
| h, k, lmax             | 14, 20, 22                              | 14, 20, 22               |              |
| Nref                   | 7234                                    | 7195                     |              |
| Tmin, Tmax             | 0.343, 0.426                            | 0.560, 0.745             |              |
| Tmin'                  | 0.317                                   |                          |              |

Correction method= # Reported T Limits: Tmin=0.560 Tmax=0.745  
AbsCorr = MULTI-SCAN

Data completeness= 0.995      Theta (max)= 24.631

R(reflections)= 0.0667( 5734)

wR2(reflections)=  
0.2173( 7195)

S = 1.042

Npar= 550

The following ALERTS were generated. Each ALERT has the format

**test-name\_ALERT\_alert-type\_alert-level.**

Click on the hyperlinks for more details of the test.

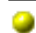

### Alert level C

RINTA01\_ALERT\_3\_C The value of Rint is greater than 0.12

Rint given 0.157

THETM01\_ALERT\_3\_C The value of sine(theta\_max)/wavelength is less than 0.590

Calculated sin(theta\_max)/wavelength = 0.5864

PLAT234\_ALERT\_4\_C Large Hirshfeld Difference O016 --C01P . 0.18 Ang.

PLAT234\_ALERT\_4\_C Large Hirshfeld Difference C00Q --C01A . 0.16 Ang.

PLAT241\_ALERT\_2\_C High 'MainMol' Ueq as Compared to Neighbors of O016 Check

PLAT242\_ALERT\_2\_C Low 'MainMol' Ueq as Compared to Neighbors of C01P Check

PLAT250\_ALERT\_2\_C Large U3/U1 Ratio for <U(i,j)> Tensor(Resd 1) 2.1 Note

PLAT342\_ALERT\_3\_C Low Bond Precision on C-C Bonds ..... 0.01759 Ang.

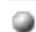

### Alert level G

PLAT004\_ALERT\_5\_G Polymeric Structure Found with Maximum Dimension 1 Info

PLAT020\_ALERT\_3\_G The Value of Rint is Greater Than 0.12 ..... 0.157 Report

PLAT072\_ALERT\_2\_G SHELXL First Parameter in WGHT Unusually Large 0.14 Report

PLAT083\_ALERT\_2\_G SHELXL Second Parameter in WGHT Unusually Large 44.46 Why ?

PLAT232\_ALERT\_2\_G Hirshfeld Test Diff (M-X) Pb --C106 . 7.3 s.u.

PLAT232\_ALERT\_2\_G Hirshfeld Test Diff (M-X) Pb01 --C106\_a . 7.3 s.u.

PLAT605\_ALERT\_4\_G Largest Solvent Accessible VOID in the Structure 49 A\*\*3

PLAT720\_ALERT\_4\_G Number of Unusual/Non-Standard Labels ..... 88 Note

Pb01 Co03 C104 C105 C106 C107 O008 N009

O00A N00B N00C N00D N00E N00F C00G O00H

C00I C00J C00K H00K C00L C00M C00N H00N

C00O H00O C00P C00Q H00Q C00R C00S H00S

C00T C00U H00U C00V H00V C00W C00X H00X

C00Y H00Y C00Z H00Z C010 C011 H011 C012

H012 C013 H013 C014 C015 O016 C017 H017

C018 H018 C019 C01A C01B H01B C01C H01C

C01D H01D C01E H01E C01F H01F C01G H01G

C01H H01H C01I C01J H01J C01K H01K C01L

H01L C01M H01M C01N H01N C01O H01O C01P

PLAT794\_ALERT\_5\_G Tentative Bond Valency for Pb (II) . 2.24 Info

PLAT794\_ALERT\_5\_G Tentative Bond Valency for Pb01 (II) . 2.22 Info

PLAT794\_ALERT\_5\_G Tentative Bond Valency for Co03 (III) . 2.96 Info

PLAT868\_ALERT\_4\_G ALERTS Due to the Use of \_smtbx\_masks Suppressed ! Info

0 **ALERT level A** = Most likely a serious problem - resolve or explain

0 **ALERT level B** = A potentially serious problem, consider carefully

8 **ALERT level C** = Check. Ensure it is not caused by an omission or oversight

12 **ALERT level G** = General information/check it is not something unexpected

0 ALERT type 1 CIF construction/syntax error, inconsistent or missing data

7 ALERT type 2 Indicator that the structure model may be wrong or deficient  
4 ALERT type 3 Indicator that the structure quality may be low  
5 ALERT type 4 Improvement, methodology, query or suggestion  
4 ALERT type 5 Informative message, check

---

---

It is advisable to attempt to resolve as many as possible of the alerts in all categories. Often the minor alerts point to easily fixed oversights, errors and omissions in your CIF or refinement strategy, so attention to these fine details can be worthwhile. In order to resolve some of the more serious problems it may be necessary to carry out additional measurements or structure refinements. However, the purpose of your study may justify the reported deviations and the more serious of these should normally be commented upon in the discussion or experimental section of a paper or in the "special\_details" fields of the CIF. checkCIF was carefully designed to identify outliers and unusual parameters, but every test has its limitations and alerts that are not important in a particular case may appear. Conversely, the absence of alerts does not guarantee there are no aspects of the results needing attention. It is up to the individual to critically assess their own results and, if necessary, seek expert advice.

### **Publication of your CIF in IUCr journals**

A basic structural check has been run on your CIF. These basic checks will be run on all CIFs submitted for publication in IUCr journals (*Acta Crystallographica*, *Journal of Applied Crystallography*, *Journal of Synchrotron Radiation*); however, if you intend to submit to *Acta Crystallographica Section C* or *E* or *IUCrData*, you should make sure that full publication checks are run on the final version of your CIF prior to submission.

### **Publication of your CIF in other journals**

Please refer to the *Notes for Authors* of the relevant journal for any special instructions relating to CIF submission.

---

**PLATON version of 02/02/2025; check.def file version of 02/02/2025**

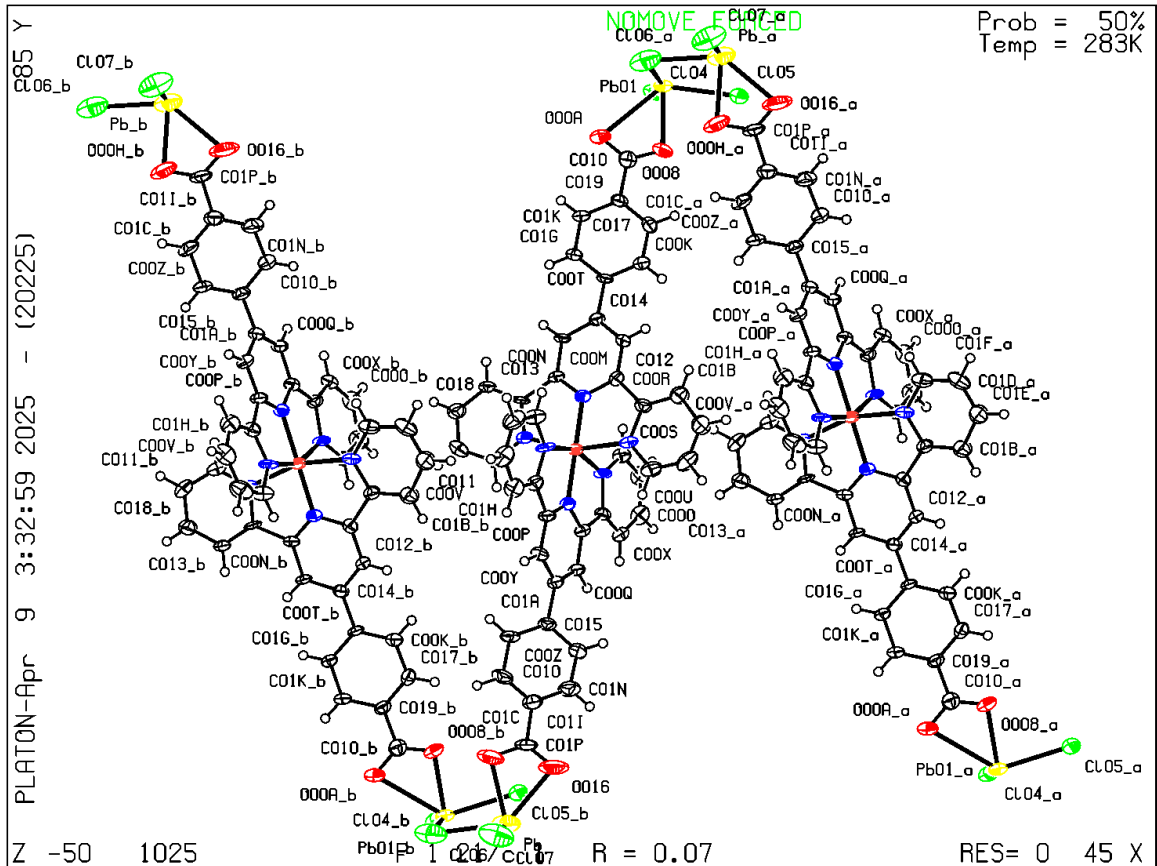

## checkCIF/PLATON report

Structure factors have been supplied for datablock(s) mo\_240920c\_0m\_b

THIS REPORT IS FOR GUIDANCE ONLY. IF USED AS PART OF A REVIEW PROCEDURE FOR PUBLICATION, IT SHOULD NOT REPLACE THE EXPERTISE OF AN EXPERIENCED CRYSTALLOGRAPHIC REFEREE.

No syntax errors found.      CIF dictionary      Interpreting this report

### Datablock: mo\_240920c\_0m\_b

---

|                        |                                      |                                                             |
|------------------------|--------------------------------------|-------------------------------------------------------------|
| Bond precision:        | C-C = 0.0135 A                       | Wavelength=0.71073                                          |
| Cell:                  | a=12.629 (3)<br>alpha=90             | b=17.519 (4)<br>beta=95.414 (8)<br>c=18.925 (4)<br>gamma=90 |
| Temperature:           | 286 K                                |                                                             |
|                        | Calculated                           | Reported                                                    |
| Volume                 | 4168.4 (16)                          | 4168.3 (16)                                                 |
| Space group            | P 21/c                               | P 1 21/c 1                                                  |
| Hall group             | -P 2ybc                              | -P 2ybc                                                     |
| Moiety formula         | C44 H28 Cl4 Fe N6 O4 Pb2 [+ solvent] | C44 H28 Cl4 Fe N6 O4 Pb2, 2[H2O]                            |
| Sum formula            | C44 H28 Cl4 Fe N6 O4 Pb2 [+ solvent] | C44 H32 Cl4 Fe N6 O6 Pb2                                    |
| Mr                     | 1316.78                              | 1352.78                                                     |
| Dx, g cm <sup>-3</sup> | 2.098                                | 2.156                                                       |
| Z                      | 4                                    | 4                                                           |
| Mu (mm <sup>-1</sup> ) | 8.711                                | 8.717                                                       |
| F000                   | 2496.0                               | 2576.0                                                      |
| F000'                  | 2474.32                              |                                                             |
| h, k, lmax             | 14, 20, 22                           | 14, 20, 22                                                  |
| Nref                   | 6892                                 | 6713                                                        |
| Tmin, Tmax             | 0.295, 0.270                         | 0.589, 0.745                                                |
| Tmin'                  | 0.248                                |                                                             |

Correction method= # Reported T Limits: Tmin=0.589 Tmax=0.745  
AbsCorr = MULTI-SCAN

Data completeness= 0.974      Theta (max)= 24.437

R(reflections)= 0.0526( 5853)

wR2(reflections)=  
0.1130( 6713)

S = 1.091

Npar= 550

---

The following ALERTS were generated. Each ALERT has the format

**test-name\_ALERT\_alert-type\_alert-level.**

Click on the hyperlinks for more details of the test.

---



### Alert level C

THETM01\_ALERT\_3\_C The value of sine(theta\_max)/wavelength is less than 0.590

Calculated sin(theta\_max)/wavelength = 0.5821

PLAT029\_ALERT\_3\_C \_diffn\_measured\_fraction\_theta\_full value Low . 0.974 Why?

PLAT342\_ALERT\_3\_C Low Bond Precision on C-C Bonds ..... 0.01345 Ang.

PLAT906\_ALERT\_3\_C Large K Value in the Analysis of Variance ..... 2.469 Check

PLAT910\_ALERT\_3\_C Missing # of FCF Reflection(s) Below Theta(Min). 7 Note

1 0 0, 1 1 0, 0 2 0, -1 1 1, 0 1 1, 1 1 1,

0 0 2,

PLAT911\_ALERT\_3\_C Missing FCF Refl Between Thmin & STh/L= 0.582 171 Report

2 0 0, 3 1 0, 4 1 0, 1 2 0, 2 2 0, 3 2 0,

4 2 0, 0 4 0, 1 4 0, 1 5 0, 2 5 0, 5 5 0,

0 6 0, 3 6 0, 2 7 0, 5 7 0, 1 9 0, -5 1 1,

2 1 1, 3 1 1, 5 1 1, 2 2 1, -5 3 1, 0 3 1,

1 3 1, 5 3 1, -6 4 1, -2 4 1, -1 4 1, 1 4 1,

2 4 1, -2 5 1, 0 5 1, 1 5 1, 4 5 1, -1 6 1,

1 6 1, 2 6 1, -3 7 1, -1 8 1, -3 9 1, 1 9 1,

4 9 1, -6 0 2, -2 0 2, -1 0 2, 1 0 2, 2 0 2,

4 0 2, -3 1 2, -1 1 2, 1 1 2, 3 1 2, 5 1 2,

-3 2 2, 0 2 2, 1 2 2, 2 2 2, 6 2 2, -2 3 2,

3 3 2, 6 3 2, -4 4 2, -1 4 2, 2 4 2, 4 4 2,

0 5 2, 3 5 2, -2 6 2, 1 6 2, 5 6 2, -5 7 2,

-2 7 2, 0 7 2, 2 7 2, 3 7 2, 0 8 2, -5 1 3,

-3 1 3, -2 1 3, 3 1 3, -1 2 3, 0 2 3, 4 2 3,

-3 3 3, -2 3 3, 0 3 3, 3 3 3, -1 4 3, 2 4 3,

0 5 3, 3 5 3, -4 6 3, -1 6 3, 0 6 3, 2 7 3,

PLAT971\_ALERT\_2\_C Check Calcd Resid. Dens. 0.60Ang From Pb2 1.86 eA-3

PLAT971\_ALERT\_2\_C Check Calcd Resid. Dens. 0.38Ang From Pb2 1.62 eA-3

PLAT971\_ALERT\_2\_C Check Calcd Resid. Dens. 0.48Ang From Pb2 1.56 eA-3

PLAT971\_ALERT\_2\_C Check Calcd Resid. Dens. 0.67Ang From Pb2 1.52 eA-3

PLAT972\_ALERT\_2\_C Check Calcd Resid. Dens. 0.69Ang From Pb1 -2.43 eA-3

PLAT972\_ALERT\_2\_C Check Calcd Resid. Dens. 0.67Ang From Pb1 -2.06 eA-3

PLAT972\_ALERT\_2\_C Check Calcd Resid. Dens. 0.45Ang From Pb1 -2.06 eA-3

PLAT972\_ALERT\_2\_C Check Calcd Resid. Dens. 0.46Ang From Pb1 -1.84 eA-3

PLAT977\_ALERT\_2\_C Check Negative Difference Density on H33 . -0.33 eA-3

---

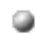

### Alert level G

FORMU01\_ALERT\_2\_G There is a discrepancy between the atom counts in the  
\_chemical\_formula\_sum and the formula from the \_atom\_site\* data.

Atom count from \_chemical\_formula\_sum: C44 H32 Cl4 Fe1 N6 O6 Pb2

Atom count from the \_atom\_site data: C44 H28 Cl4 Fe1 N6 O4 Pb2

CELLZ01\_ALERT\_1\_G Difference between formula and atom\_site contents detected.

CELLZ01\_ALERT\_1\_G ALERT: Large difference may be due to a  
symmetry error - see SYMMG tests

From the CIF: \_cell\_formula\_units\_Z 4

From the CIF: \_chemical\_formula\_sum C44 H32 Cl4 Fe N6 O6 Pb2  
 TEST: Compare cell contents of formula and atom\_site data

| atom | Z*formula | cif sites | diff  |
|------|-----------|-----------|-------|
| C    | 176.00    | 176.00    | 0.00  |
| H    | 128.00    | 112.00    | 16.00 |
| Cl   | 16.00     | 16.00     | 0.00  |
| Fe   | 4.00      | 4.00      | 0.00  |
| N    | 24.00     | 24.00     | 0.00  |
| O    | 24.00     | 16.00     | 8.00  |
| Pb   | 8.00      | 8.00      | 0.00  |

|                   |                                                            |        |              |
|-------------------|------------------------------------------------------------|--------|--------------|
| PLAT003_ALERT_2_G | Number of Uiso or U(i,j) Restrained non-H Atoms            | 61     | Report       |
| PLAT004_ALERT_5_G | Polymeric Structure Found with Maximum Dimension           | 1      | Info         |
| PLAT041_ALERT_1_G | Calc. and Reported SumFormula Strings Differ               |        | Please Check |
|                   | Calc: C44 H28 Cl4 Fe N6 O4 Pb2                             |        |              |
|                   | Rep.: C44 H32 Cl4 Fe N6 O6 Pb2                             |        |              |
| PLAT042_ALERT_1_G | Calc. and Reported MoietyFormula Strings Differ            |        | Please Check |
|                   | Calc: C44 H28 Cl4 Fe N6 O4 Pb2                             |        |              |
|                   | Rep.: C44 H28 Cl4 Fe N6 O4 Pb2, 2[H2O]                     |        |              |
| PLAT083_ALERT_2_G | SHELXL Second Parameter in WGHT Unusually Large            | 80.00  | Why ?        |
| PLAT177_ALERT_4_G | The CIF-Embedded .res File Contains DELU Records           | 1      | Report       |
| PLAT178_ALERT_4_G | The CIF-Embedded .res File Contains SIMU Records           | 1      | Report       |
| PLAT188_ALERT_3_G | A Non-default SIMU Restraint Value has been used           | 0.0100 | Report       |
| PLAT232_ALERT_2_G | Hirshfeld Test Diff (M-X) Pb1 --Cl2 .                      | 5.5    | s.u.         |
| PLAT232_ALERT_2_G | Hirshfeld Test Diff (M-X) Pb2 --Cl2_a .                    | 13.5   | s.u.         |
| PLAT605_ALERT_4_G | Largest Solvent Accessible VOID in the Structure           | 42     | A**3         |
| PLAT720_ALERT_4_G | Number of Unusual/Non-Standard Labels .....                | 9      | Note         |
|                   | C00P C00X H00X C01B H01B C014 H014 C015                    |        |              |
|                   | H015                                                       |        |              |
| PLAT794_ALERT_5_G | Tentative Bond Valency for Pb1 (II) .                      | 2.34   | Info         |
| PLAT794_ALERT_5_G | Tentative Bond Valency for Pb2 (II) .                      | 2.33   | Info         |
| PLAT860_ALERT_3_G | Number of Least-Squares Restraints .....                   | 595    | Note         |
| PLAT868_ALERT_4_G | ALERTS Due to the Use of _smtbx_masks Suppressed           |        | ! Info       |
| PLAT883_ALERT_1_G | No Info/Value for _atom_sites_solution_primary .           |        | Please Do !  |
| PLAT909_ALERT_3_G | Percentage of I>2sig(I) Data at Theta(Max) Still           | 68%    | Note         |
| PLAT933_ALERT_2_G | Number of HKL-OMIT Records in Embedded .res File           | 170    | Note         |
|                   | -6 0 2, -6 4 1, -5 1 1, -5 1 3, -5 3 1, -5 5 4,            |        |              |
|                   | -5 7 2, -4 0 4, -4 3 8, -4 4 2, -4 4 7, -4 6 3,            |        |              |
|                   | -4 6 5, -4 7 4, -3 0 6, -3 0 8, -3 1 2, -3 1 3,            |        |              |
|                   | -3 1 6, -3 1 8, -3 2 2, -3 2 5, -3 2 6, -3 3 3,            |        |              |
|                   | -3 4 7, -3 6 5, -3 7 1, -3 8 7, -3 9 1, -2 0 2,            |        |              |
|                   | -2 0 4, -2 1 3, -2 1 7, -2 1 9, -2 2 6, -2 2 8,            |        |              |
|                   | -2 3 2, -2 3 3, -2 3 5, -2 3 8, -2 4 1, -2 4 4,            |        |              |
|                   | -2 5 1, -2 6 2, -2 7 2, -2 8 4, -1 0 2, -1 0 4,            |        |              |
|                   | -1 1 2, -1 1 4,                                            |        |              |
| PLAT969_ALERT_5_G | The 'Henn et al.' R-Factor-gap value .....                 | 3.506  | Note         |
|                   | Predicted wR2: Based on SigI**2 3.22 or SHELX Weight 10.35 |        |              |
| PLAT978_ALERT_2_G | Number C-C Bonds with Positive Residual Density.           | 0      | Info         |

---

0 **ALERT level A** = Most likely a serious problem - resolve or explain  
 0 **ALERT level B** = A potentially serious problem, consider carefully  
 15 **ALERT level C** = Check. Ensure it is not caused by an omission or oversight  
 24 **ALERT level G** = General information/check it is not something unexpected

5 ALERT type 1 CIF construction/syntax error, inconsistent or missing data

16 ALERT type 2 Indicator that the structure model may be wrong or deficient  
9 ALERT type 3 Indicator that the structure quality may be low  
5 ALERT type 4 Improvement, methodology, query or suggestion  
4 ALERT type 5 Informative message, check

---

---

It is advisable to attempt to resolve as many as possible of the alerts in all categories. Often the minor alerts point to easily fixed oversights, errors and omissions in your CIF or refinement strategy, so attention to these fine details can be worthwhile. In order to resolve some of the more serious problems it may be necessary to carry out additional measurements or structure refinements. However, the purpose of your study may justify the reported deviations and the more serious of these should normally be commented upon in the discussion or experimental section of a paper or in the "special\_details" fields of the CIF. checkCIF was carefully designed to identify outliers and unusual parameters, but every test has its limitations and alerts that are not important in a particular case may appear. Conversely, the absence of alerts does not guarantee there are no aspects of the results needing attention. It is up to the individual to critically assess their own results and, if necessary, seek expert advice.

#### **Publication of your CIF in IUCr journals**

A basic structural check has been run on your CIF. These basic checks will be run on all CIFs submitted for publication in IUCr journals (*Acta Crystallographica*, *Journal of Applied Crystallography*, *Journal of Synchrotron Radiation*); however, if you intend to submit to *Acta Crystallographica Section C* or *E* or *IUCrData*, you should make sure that full publication checks are run on the final version of your CIF prior to submission.

#### **Publication of your CIF in other journals**

Please refer to the *Notes for Authors* of the relevant journal for any special instructions relating to CIF submission.

---

**PLATON version of 22/08/2024; check.def file version of 21/08/2024**



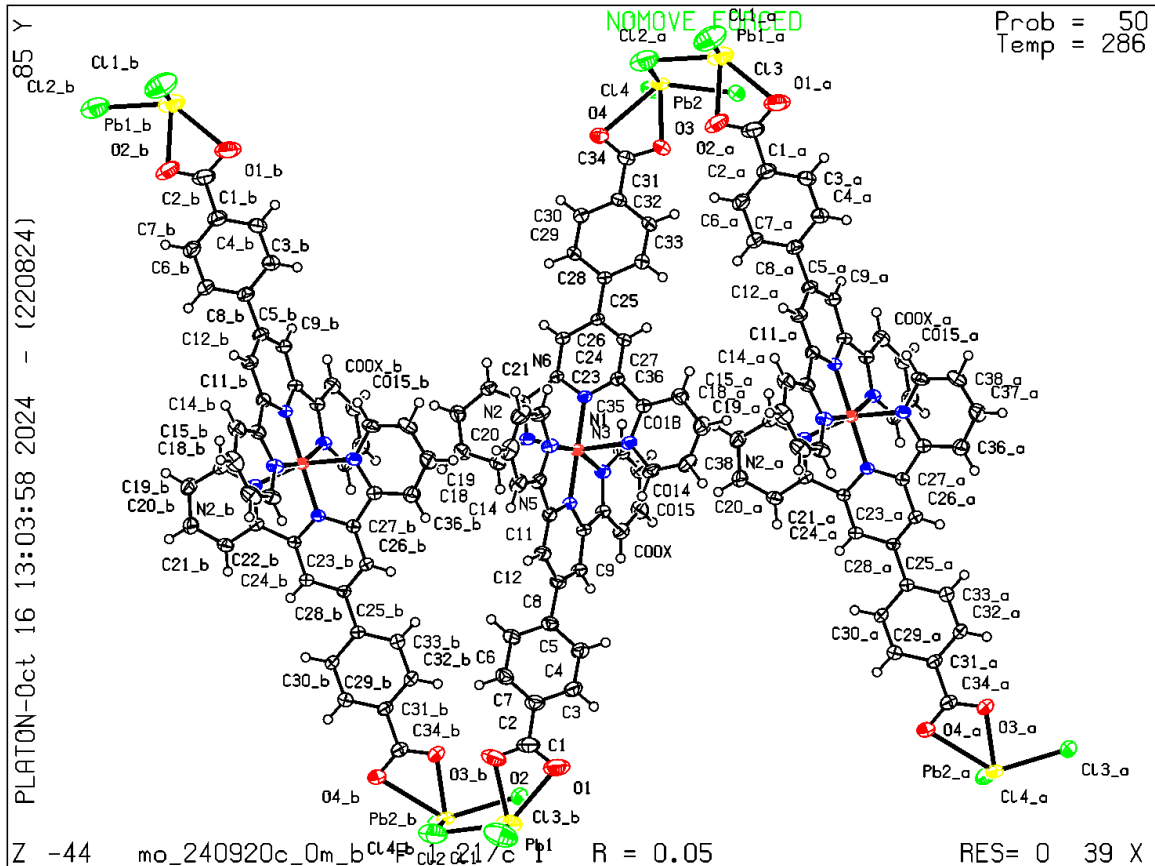

## checkCIF/PLATON report

Structure factors have been supplied for datablock(s) mo\_240906f\_a

THIS REPORT IS FOR GUIDANCE ONLY. IF USED AS PART OF A REVIEW PROCEDURE FOR PUBLICATION, IT SHOULD NOT REPLACE THE EXPERTISE OF AN EXPERIENCED CRYSTALLOGRAPHIC REFEREE.

No syntax errors found.      CIF dictionary      Interpreting this report

### Datablock: mo\_240906f\_a

---

|                        |                                                                 |                                                                |
|------------------------|-----------------------------------------------------------------|----------------------------------------------------------------|
| Bond precision:        | C-C = 0.0140 A                                                  | Wavelength=0.71073                                             |
| Cell:                  | a=12.4027 (10)<br>alpha=90                                      | b=17.5860 (9)<br>beta=94.761 (3)<br>c=19.0115 (14)<br>gamma=90 |
| Temperature:           | 100 K                                                           |                                                                |
|                        | Calculated                                                      | Reported                                                       |
| Volume                 | 4132.4 (5)                                                      | 4132.4 (5)                                                     |
| Space group            | P 21/c                                                          | P 1 21/c 1                                                     |
| Hall group             | -P 2ybc                                                         | -P 2ybc                                                        |
| Moiety formula         | C44 H28 Cl4 N6 Ni O4 Pb2 [+ C44 H28 Cl4 N6 Ni O4 Pb2, solvent]  | 0.75[H2O]                                                      |
| Sum formula            | C44 H28 Cl4 N6 Ni O4 Pb2 [+ C44 H29.50 Cl4 N6 Ni O4.75 solvent] | Pb2                                                            |
| Mr                     | 1319.62                                                         | 1333.12                                                        |
| Dx, g cm <sup>-3</sup> | 2.121                                                           | 2.143                                                          |
| Z                      | 4                                                               | 4                                                              |
| Mu (mm <sup>-1</sup> ) | 8.891                                                           | 8.894                                                          |
| F000                   | 2504.0                                                          | 2534.0                                                         |
| F000'                  | 2482.31                                                         |                                                                |
| h, k, lmax             | 14, 20, 22                                                      | 14, 20, 22                                                     |
| Nref                   | 6835                                                            | 6689                                                           |
| Tmin, Tmax             | 0.287, 0.263                                                    | 0.003, 0.014                                                   |
| Tmin'                  | 0.242                                                           |                                                                |

Correction method= # Reported T Limits: Tmin=0.003 Tmax=0.014  
AbsCorr = MULTI-SCAN

Data completeness= 0.979      Theta (max)= 24.437

R(reflections)= 0.0516( 6193)

wR2(reflections)=  
0.1116( 6689)

S = 1.089

Npar= 550

The following ALERTS were generated. Each ALERT has the format

**test-name\_ALERT\_alert-type\_alert-level.**

Click on the hyperlinks for more details of the test.



### Alert level C

THETM01\_ALERT\_3\_C The value of sine(theta\_max)/wavelength is less than 0.590  
Calculated sin(theta\_max)/wavelength = 0.5821

PLAT029\_ALERT\_3\_C \_diffrn\_measured\_fraction\_theta\_full value Low . 0.979 Why?

PLAT234\_ALERT\_4\_C Large Hirshfeld Difference O2 --Cl . 0.16 Ang.

PLAT241\_ALERT\_2\_C High 'MainMol' Ueq as Compared to Neighbors of O1 Check

PLAT342\_ALERT\_3\_C Low Bond Precision on C-C Bonds ..... 0.014 Ang.

PLAT906\_ALERT\_3\_C Large K Value in the Analysis of Variance ..... 2.488 Check

PLAT910\_ALERT\_3\_C Missing # of FCF Reflection(s) Below Theta(Min). 9 Note

1 0 0, 1 1 0, 0 2 0, -1 1 1, 0 1 1, 1 1 1,  
0 2 1, 0 0 2, 0 1 2,

PLAT911\_ALERT\_3\_C Missing FCF Refl Between Thmin & STh/L= 0.582 137 Report

4 0 0, 3 1 0, 1 2 0, 2 2 0, 1 3 0, 2 3 0,  
3 3 0, 2 5 0, 3 5 0, 0 6 0, 1 6 0, 2 7 0,  
0 10 0, -5 1 1, -4 1 1, -2 1 1, 2 1 1, 3 1 1,  
-2 2 1, 1 2 1, 2 2 1, 3 2 1, -2 4 1, -1 4 1,  
0 4 1, 1 4 1, 2 4 1, -3 5 1, -1 6 1, 0 6 1,  
1 6 1, -1 8 1, -3 9 1, 1 9 1, -3 0 2, -2 0 2,  
1 0 2, 2 0 2, -3 1 2, -1 1 2, 1 1 2, 2 1 2,  
3 1 2, -4 2 2, -1 2 2, 0 2 2, 1 2 2, 3 2 2,  
-4 3 2, -3 3 2, -2 3 2, 2 3 2, 3 3 2, -1 4 2,  
2 4 2, -4 5 2, -2 5 2, 0 5 2, 3 5 2, -2 6 2,  
1 6 2, 3 7 2, 0 8 2, -5 1 3, -4 1 3, 0 1 3,  
1 1 3, -2 2 3, -1 2 3, 0 2 3, 1 2 3, -4 3 3,  
0 3 3, 3 3 3, -1 4 3, 0 4 3, 1 4 3, 2 4 3,  
-1 6 3, 0 6 3, 2 7 3, -4 0 4, -3 0 4, -2 0 4,  
-1 0 4, 0 0 4, -2 1 4, -1 1 4, -6 2 4, -1 2 4,  
0 2 4, 0 3 4, -3 4 4, -1 4 4, 0 4 4, 0 5 4,

PLAT972\_ALERT\_2\_C Check Calcd Resid. Dens. 0.54Ang From Pb1 -2.49 eA-3

PLAT972\_ALERT\_2\_C Check Calcd Resid. Dens. 0.47Ang From Pb1 -2.34 eA-3

PLAT972\_ALERT\_2\_C Check Calcd Resid. Dens. 0.48Ang From Pb1 -2.21 eA-3

PLAT972\_ALERT\_2\_C Check Calcd Resid. Dens. 0.71Ang From Pb1 -2.13 eA-3

PLAT976\_ALERT\_2\_C Check Calcd Resid. Dens. 0.97Ang From O1 . -0.52 eA-3

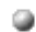

### Alert level G

FORMU01\_ALERT\_2\_G There is a discrepancy between the atom counts in the  
\_chemical\_formula\_sum and the formula from the \_atom\_site\* data.  
Atom count from \_chemical\_formula\_sum: C44 H29.5 Cl4 N6 Ni1 O4.75 Pb2  
Atom count from the \_atom\_site data: C44 H28 Cl4 N6 Ni1 O4 Pb2

CELLZ01\_ALERT\_1\_G Difference between formula and atom\_site contents detected.

CELLZ01\_ALERT\_1\_G ALERT: Large difference may be due to a  
symmetry error - see SYMMG tests

From the CIF: \_cell\_formula\_units\_Z 4

From the CIF: \_chemical\_formula\_sum C44 H29.50 Cl4 N6 Ni O4.75 Pb2

TEST: Compare cell contents of formula and atom\_site data

| atom                                                               | Z*formula | cif sites | diff |                            |       |
|--------------------------------------------------------------------|-----------|-----------|------|----------------------------|-------|
| C                                                                  | 176.00    | 176.00    | 0.00 |                            |       |
| H                                                                  | 118.00    | 112.00    | 6.00 |                            |       |
| Cl                                                                 | 16.00     | 16.00     | 0.00 |                            |       |
| N                                                                  | 24.00     | 24.00     | 0.00 |                            |       |
| Ni                                                                 | 4.00      | 4.00      | 0.00 |                            |       |
| O                                                                  | 19.00     | 16.00     | 3.00 |                            |       |
| Pb                                                                 | 8.00      | 8.00      | 0.00 |                            |       |
| PLAT004_ALERT_5_G Polymeric Structure Found with Maximum Dimension |           |           |      | 1                          | Info  |
| PLAT041_ALERT_1_G Calc. and Reported SumFormula Strings Differ     |           |           |      | Please Check               |       |
| Calc: C44 H28 Cl4 N6 Ni O4 Pb2                                     |           |           |      |                            |       |
| Rep.: C44 H29.50 Cl4 N6 Ni O4.75 Pb2                               |           |           |      |                            |       |
| PLAT042_ALERT_1_G Calc. and Reported MoietyFormula Strings Differ  |           |           |      | Please Check               |       |
| Calc: C44 H28 Cl4 N6 Ni O4 Pb2                                     |           |           |      |                            |       |
| Rep.: C44 H28 Cl4 N6 Ni O4 Pb2, 0.75[H2O]                          |           |           |      |                            |       |
| PLAT083_ALERT_2_G SHELXL Second Parameter in WGHT Unusually Large  |           |           |      | 80.00                      | Why ? |
| PLAT232_ALERT_2_G Hirshfeld Test Diff (M-X) Pb1 --Cl2 .            |           |           |      | 9.9                        | s.u.  |
| PLAT232_ALERT_2_G Hirshfeld Test Diff (M-X) Pb2 --Cl2_b .          |           |           |      | 8.5                        | s.u.  |
| PLAT432_ALERT_2_G Short Inter X...Y Contact C7 ..Cl9 .             |           |           |      | 3.20                       | Ang.  |
|                                                                    |           |           |      | -1-x,2-y,1-z = 3_476 Check |       |
| PLAT605_ALERT_4_G Largest Solvent Accessible VOID in the Structure |           |           |      | 42                         | A**3  |
| PLAT794_ALERT_5_G Tentative Bond Valency for Pb1 (II) .            |           |           |      | 2.34                       | Info  |
| PLAT794_ALERT_5_G Tentative Bond Valency for Pb2 (II) .            |           |           |      | 2.32                       | Info  |
| PLAT794_ALERT_5_G Tentative Bond Valency for Ni1 (II) .            |           |           |      | 2.24                       | Info  |
| PLAT868_ALERT_4_G ALERTS Due to the Use of _smtbx_masks Suppressed |           |           |      | ! Info                     |       |
| PLAT883_ALERT_1_G No Info/Value for _atom_sites_solution_primary . |           |           |      | Please Do !                |       |
| PLAT909_ALERT_3_G Percentage of I>2sig(I) Data at Theta(Max) Still |           |           |      | 85%                        | Note  |
| PLAT913_ALERT_3_G Missing # of Very Strong Reflections in FCF .... |           |           |      | 2                          | Note  |
| -2 0 2, -2 0 6,                                                    |           |           |      |                            |       |
| PLAT933_ALERT_2_G Number of HKL-OMIT Records in Embedded .res File |           |           |      | 137                        | Note  |
| -6 0 6, -6 2 4, -5 1 1, -5 1 3, -4 0 4, -4 1 1,                    |           |           |      |                            |       |
| -4 1 3, -4 2 2, -4 3 2, -4 3 3, -4 3 5, -4 5 2,                    |           |           |      |                            |       |
| -3 0 2, -3 0 4, -3 0 6, -3 0 8, -3 1 2, -3 1 6,                    |           |           |      |                            |       |
| -3 1 8, -3 2 5, -3 2 6, -3 3 2, -3 4 4, -3 5 1,                    |           |           |      |                            |       |
| -3 9 1, -2 0 2, -2 0 4, -2 0 6, -2 1 1, -2 1 4,                    |           |           |      |                            |       |
| -2 1 7, -2 2 1, -2 2 3, -2 2 8, -2 2 9, -2 3 2,                    |           |           |      |                            |       |
| -2 4 1, -2 5 2, -2 6 2, -2 8 4, -2 10 4, -1 0 4,                   |           |           |      |                            |       |
| -1 1 2, -1 1 4, -1 1 9, -1 1 11, -1 2 2, -1 2 3,                   |           |           |      |                            |       |
| -1 2 4, -1 4 1,                                                    |           |           |      |                            |       |
| PLAT969_ALERT_5_G The 'Henn et al.' R-Factor-gap value .....       |           |           |      | 3.748                      | Note  |
| Predicted wR2: Based on SigI**2 2.98 or SHELX Weight 10.25         |           |           |      |                            |       |
| PLAT978_ALERT_2_G Number C-C Bonds with Positive Residual Density. |           |           |      | 0                          | Info  |

---

0 **ALERT level A** = Most likely a serious problem - resolve or explain  
 0 **ALERT level B** = A potentially serious problem, consider carefully  
 13 **ALERT level C** = Check. Ensure it is not caused by an omission or oversight  
 21 **ALERT level G** = General information/check it is not something unexpected

5 ALERT type 1 CIF construction/syntax error, inconsistent or missing data  
 13 ALERT type 2 Indicator that the structure model may be wrong or deficient  
 8 ALERT type 3 Indicator that the structure quality may be low  
 3 ALERT type 4 Improvement, methodology, query or suggestion  
 5 ALERT type 5 Informative message, check

---

It is advisable to attempt to resolve as many as possible of the alerts in all categories. Often the minor alerts point to easily fixed oversights, errors and omissions in your CIF or refinement strategy, so attention to these fine details can be worthwhile. In order to resolve some of the more serious problems it may be necessary to carry out additional measurements or structure refinements. However, the purpose of your study may justify the reported deviations and the more serious of these should normally be commented upon in the discussion or experimental section of a paper or in the "special\_details" fields of the CIF. checkCIF was carefully designed to identify outliers and unusual parameters, but every test has its limitations and alerts that are not important in a particular case may appear. Conversely, the absence of alerts does not guarantee there are no aspects of the results needing attention. It is up to the individual to critically assess their own results and, if necessary, seek expert advice.

### **Publication of your CIF in IUCr journals**

A basic structural check has been run on your CIF. These basic checks will be run on all CIFs submitted for publication in IUCr journals (*Acta Crystallographica*, *Journal of Applied Crystallography*, *Journal of Synchrotron Radiation*); however, if you intend to submit to *Acta Crystallographica Section C* or *E* or *IUCrData*, you should make sure that full publication checks are run on the final version of your CIF prior to submission.

### **Publication of your CIF in other journals**

Please refer to the *Notes for Authors* of the relevant journal for any special instructions relating to CIF submission.

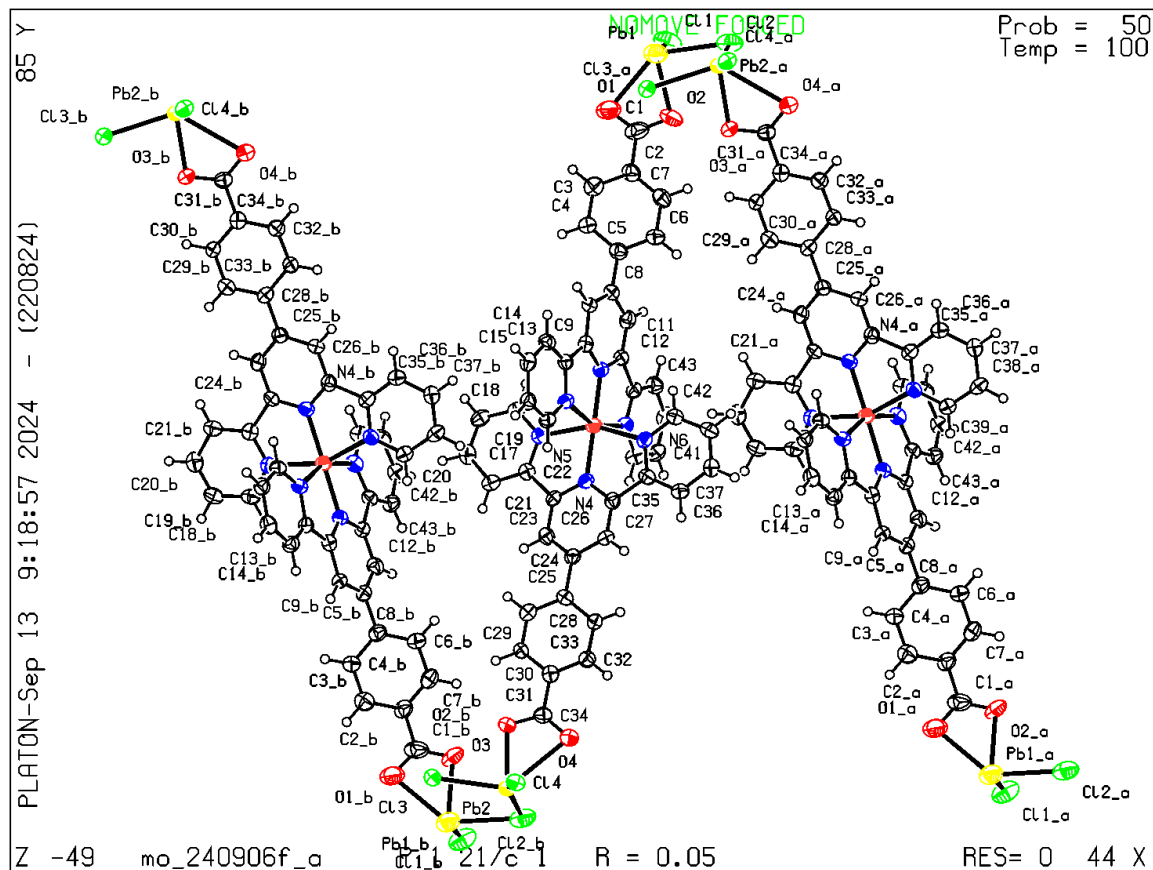

Supplement: Supplementary file 3 [file f9387dd4888bc65a5582cab5.pdf]
